# Supplementary material for: Solvent free, catalytic and diastereoselective preparation of aryl and alkyl thioglycosides as key components for oligosaccharide synthesis
Source: Royal Society of Chemistry journal article supplement (doi:10.1039/d2ob00939k), 2022-01-01

SUPPORTING INFORMATION

**Solvent free, catalytic and diastereoselective preparation of aryl  
and alkyl thioglycosides as key components for oligosaccharide  
synthesis**

Daniel L. Jensen, Helle H. Trinderup, Frederik Skovbo, Henrik H. Jensen\*

Department of Chemistry, Aarhus University, DK-8000 Aarhus C, Denmark

*hhj@chem.au.dk*

**Contents**

Spectra.....2

# Spectra

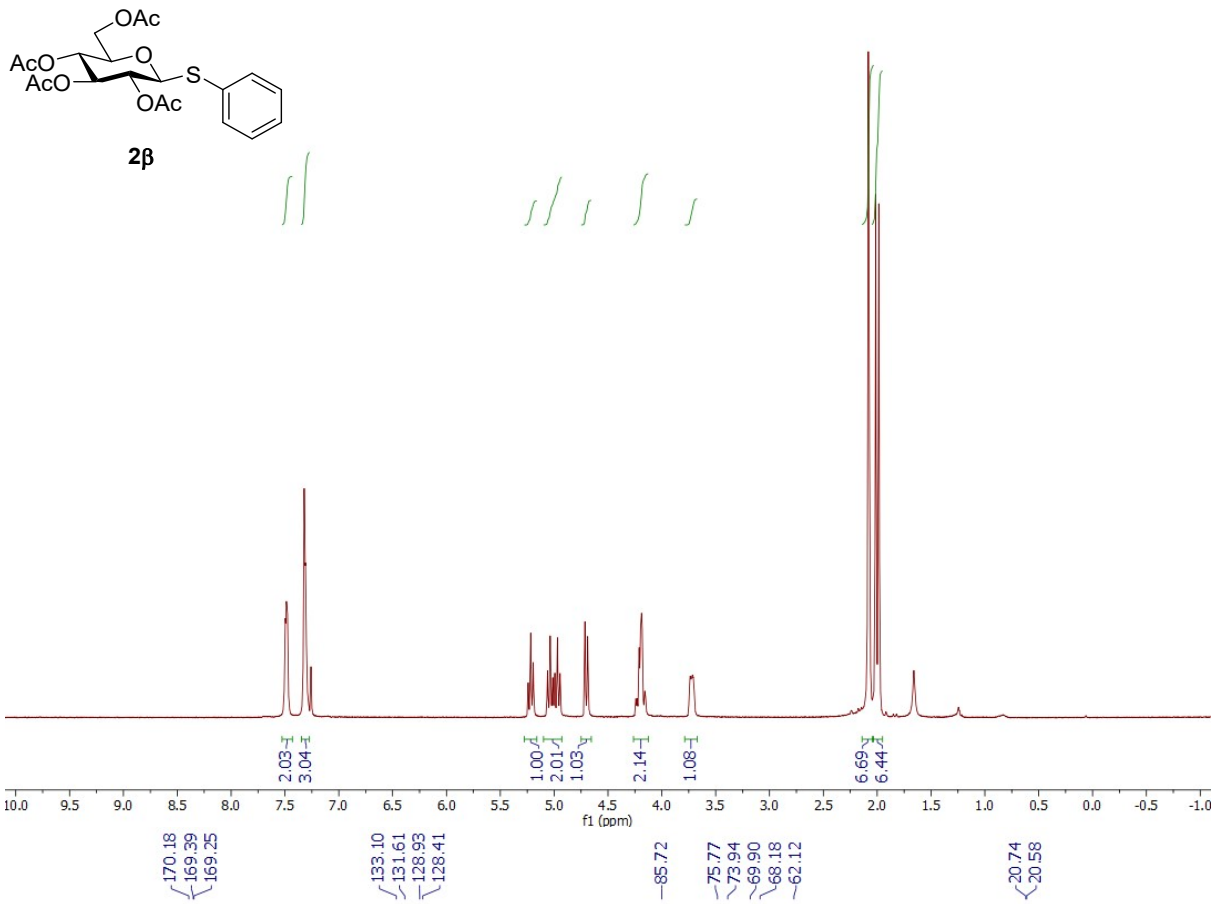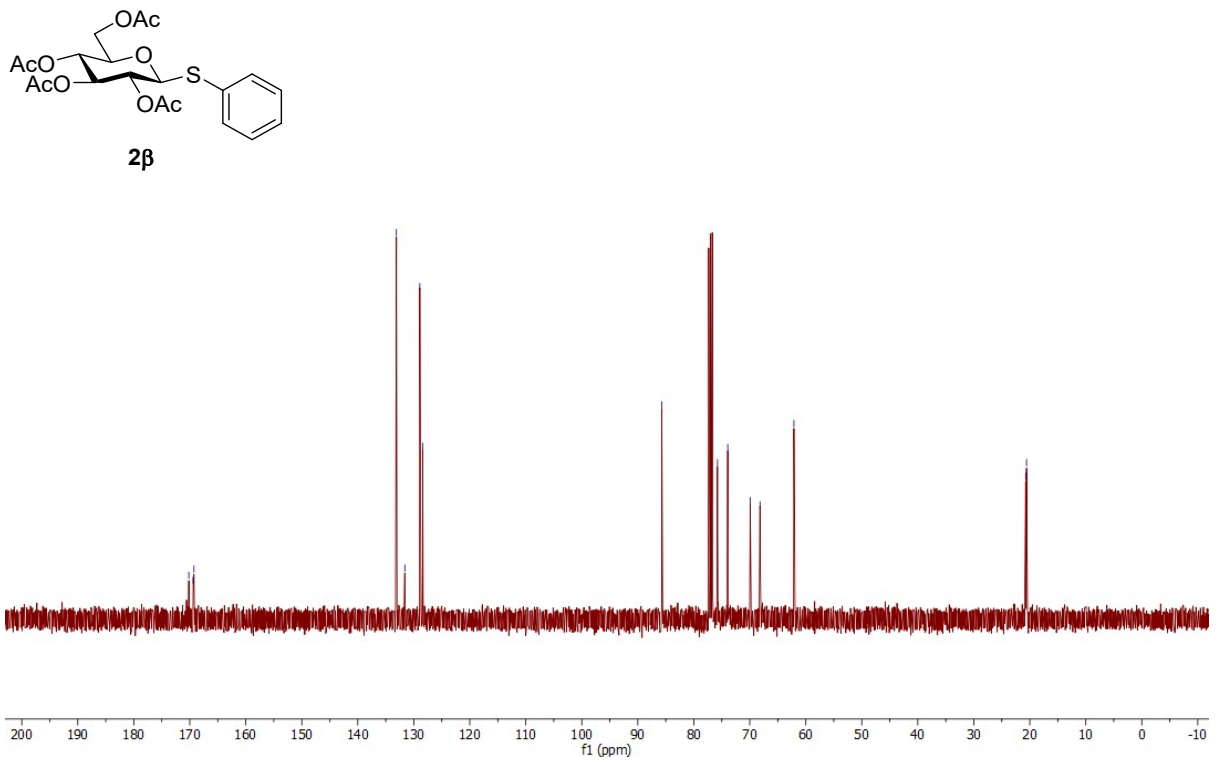



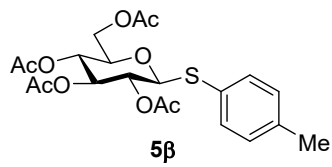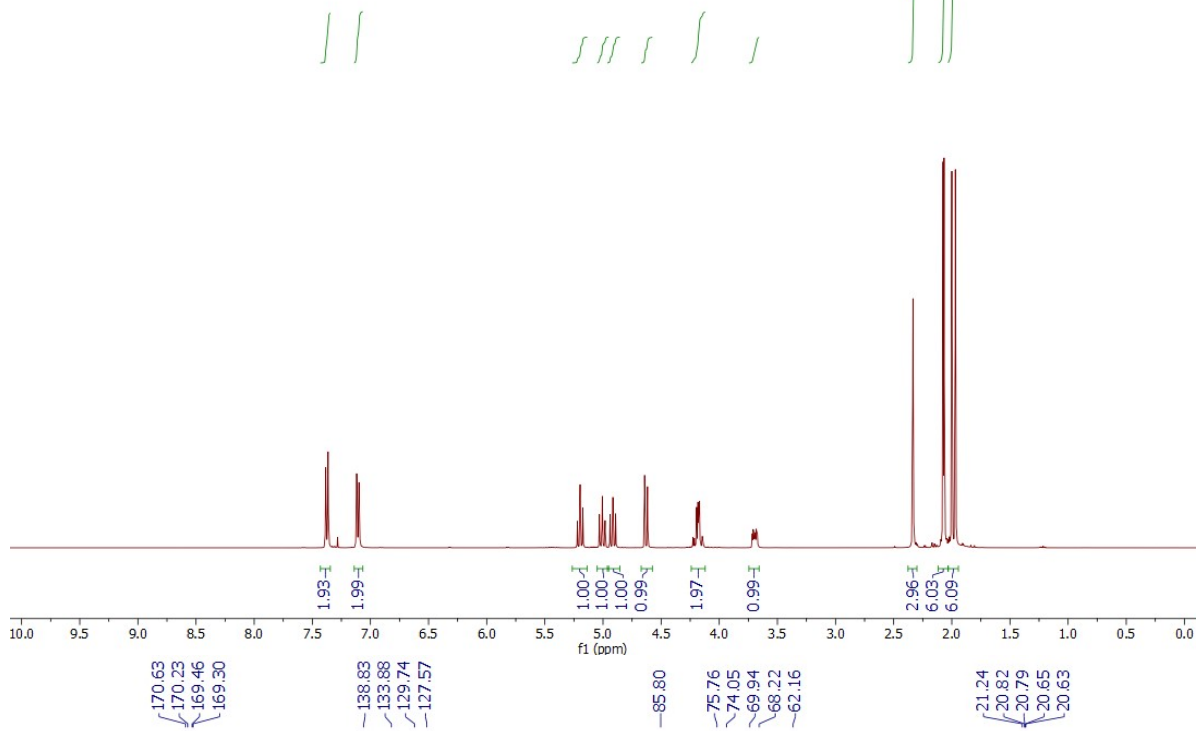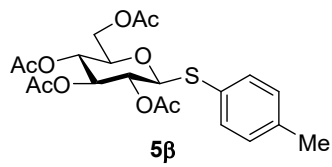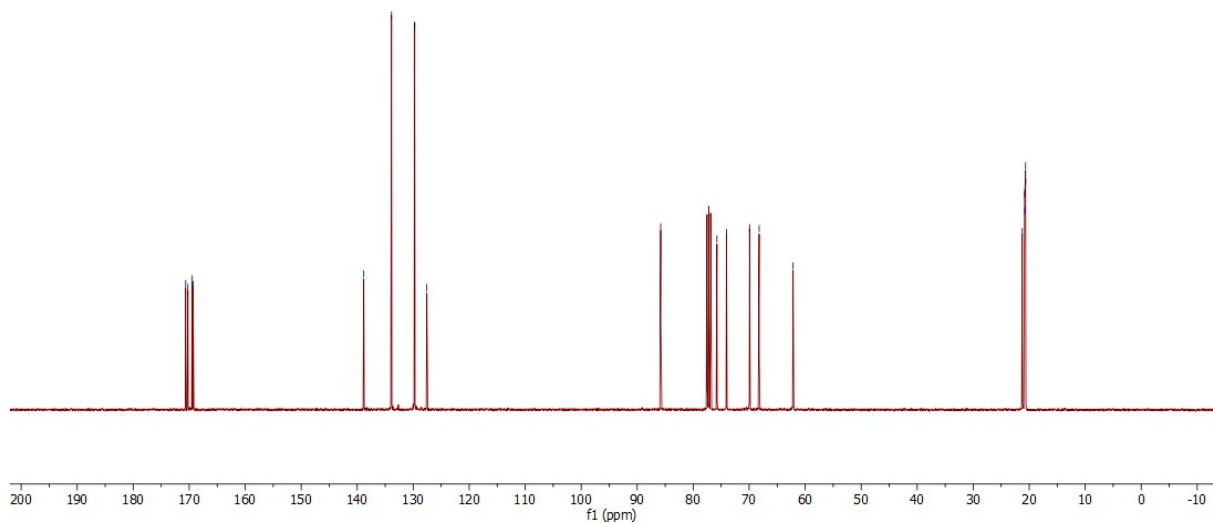

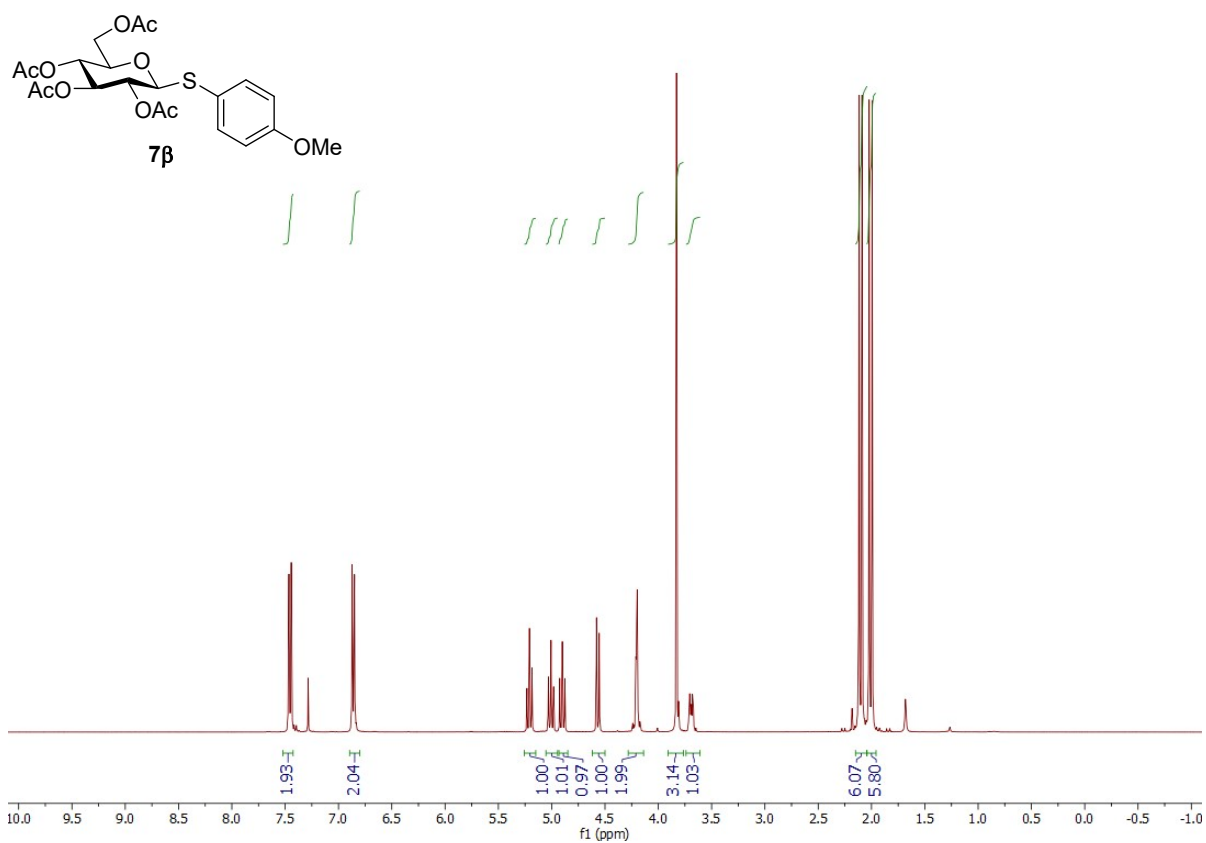

170.59  
170.22  
169.40  
169.27  
160.44

136.56

120.80

114.39

85.65

75.71

74.05

69.85

68.13

62.06

55.34

20.82

20.77

20.61

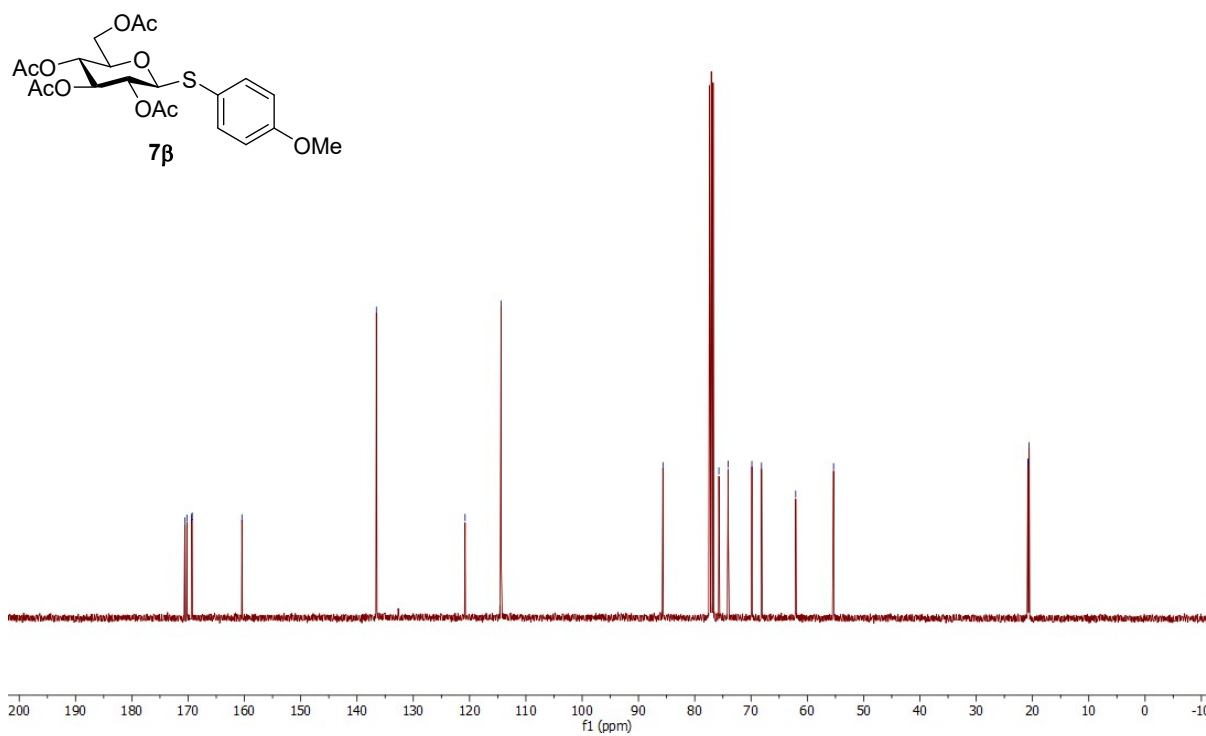

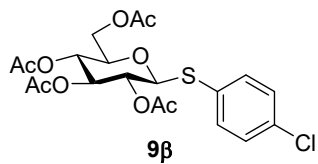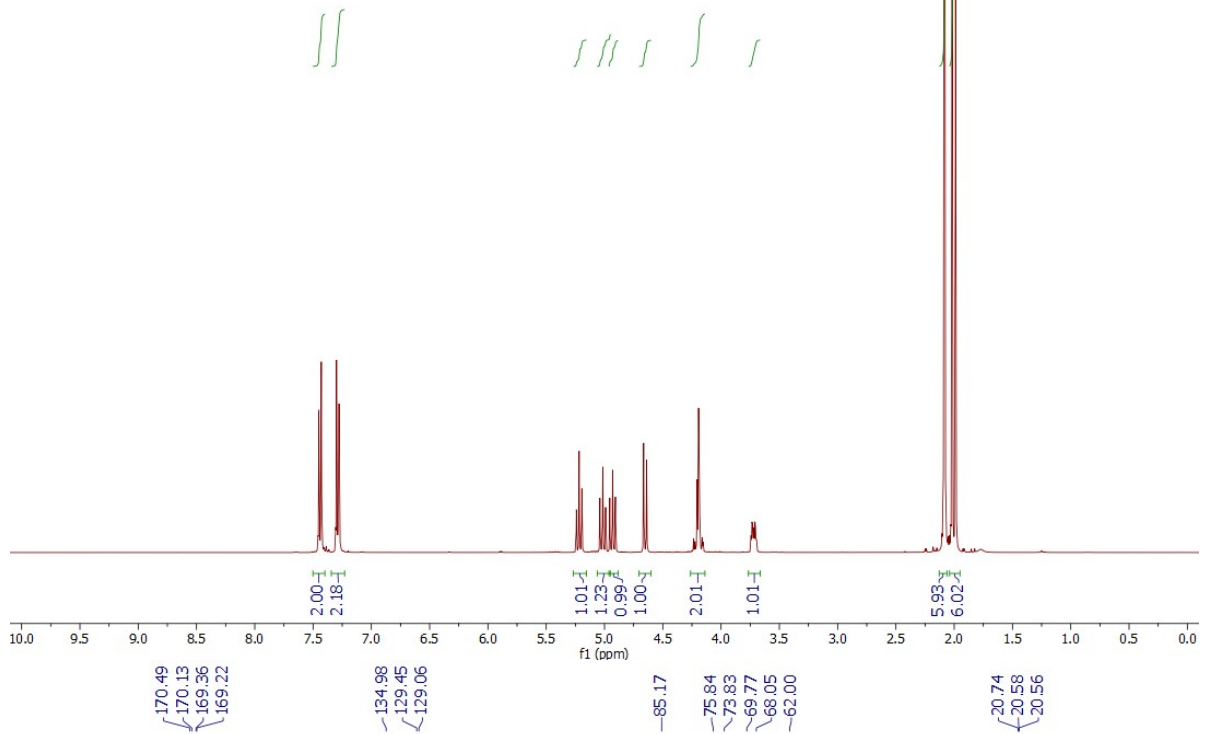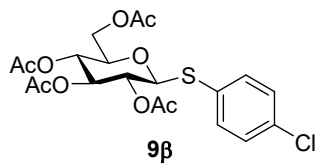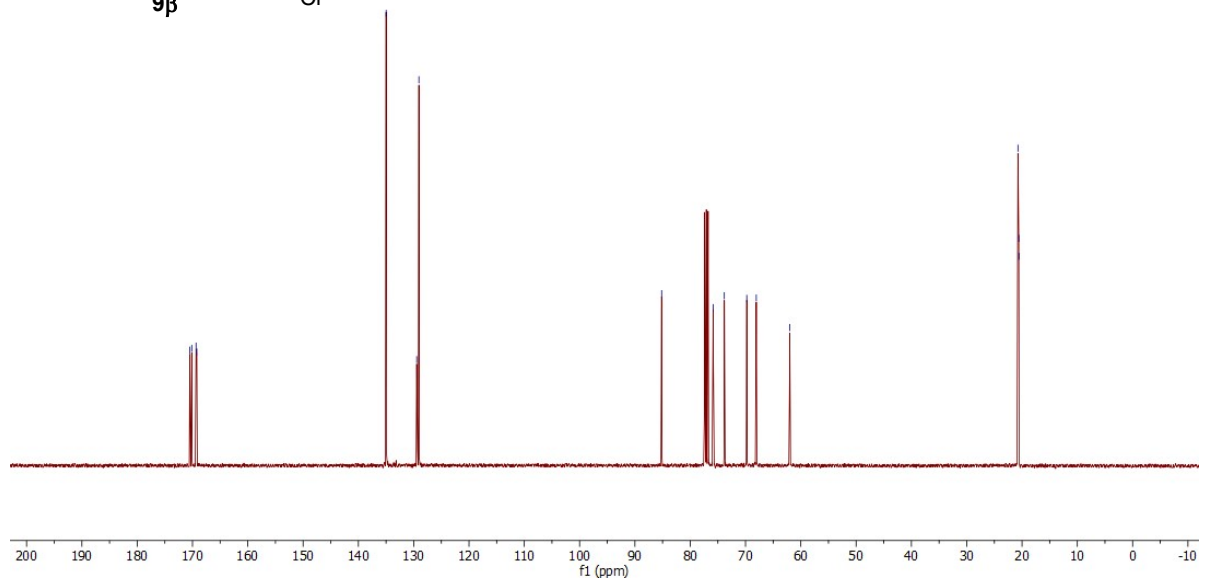

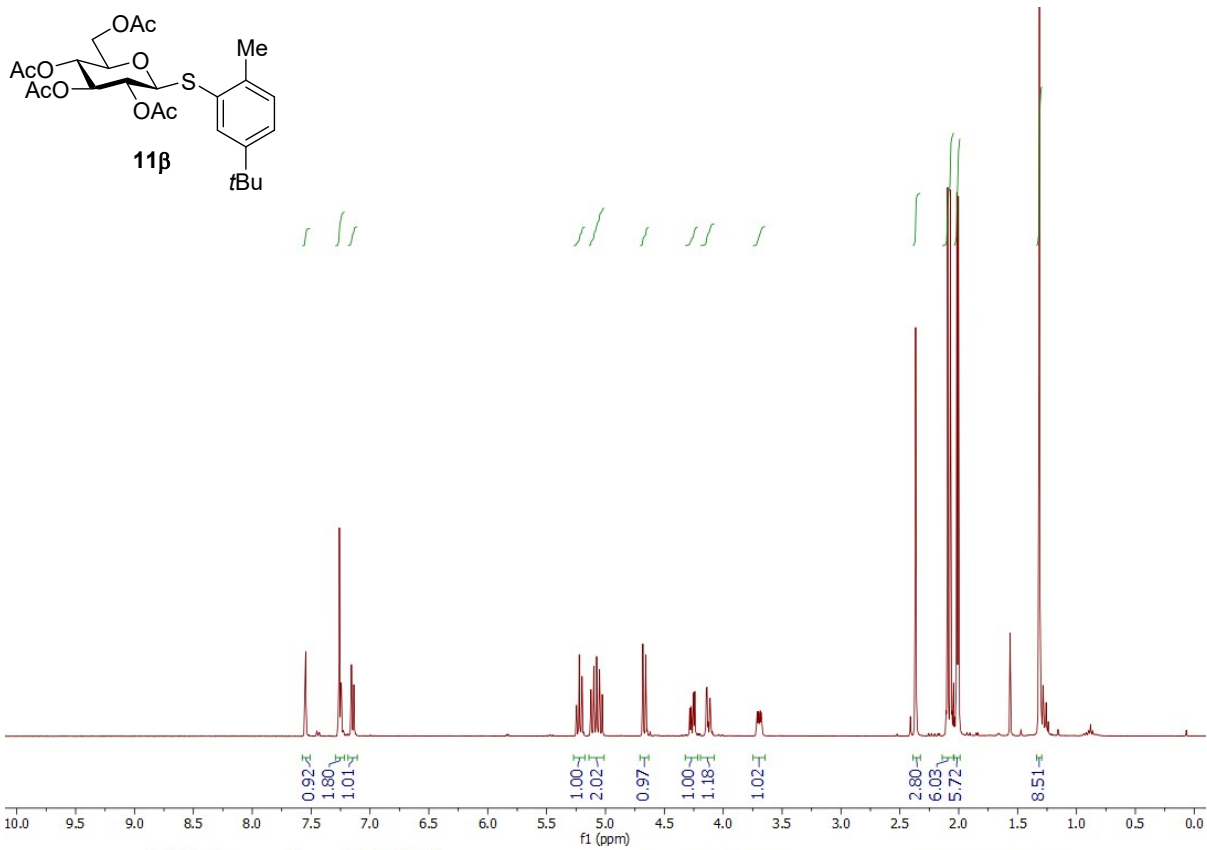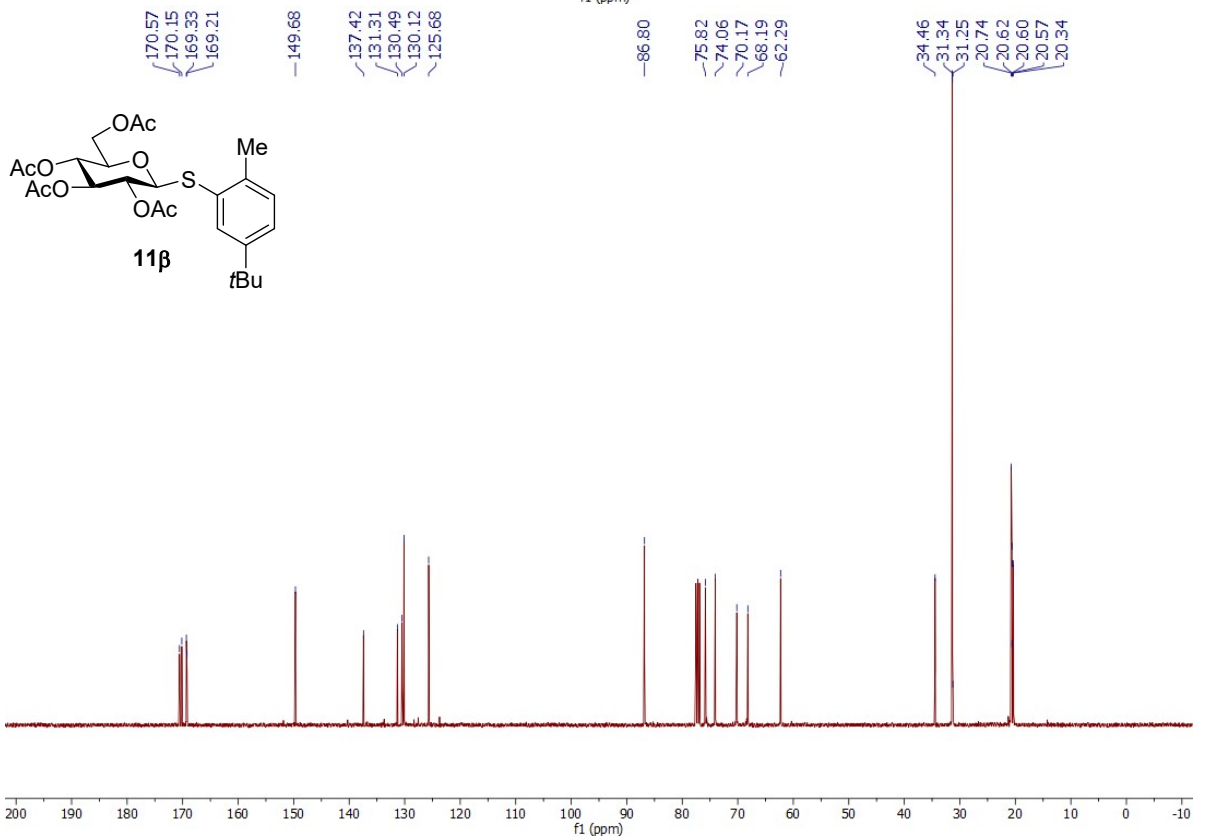



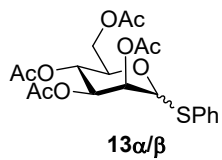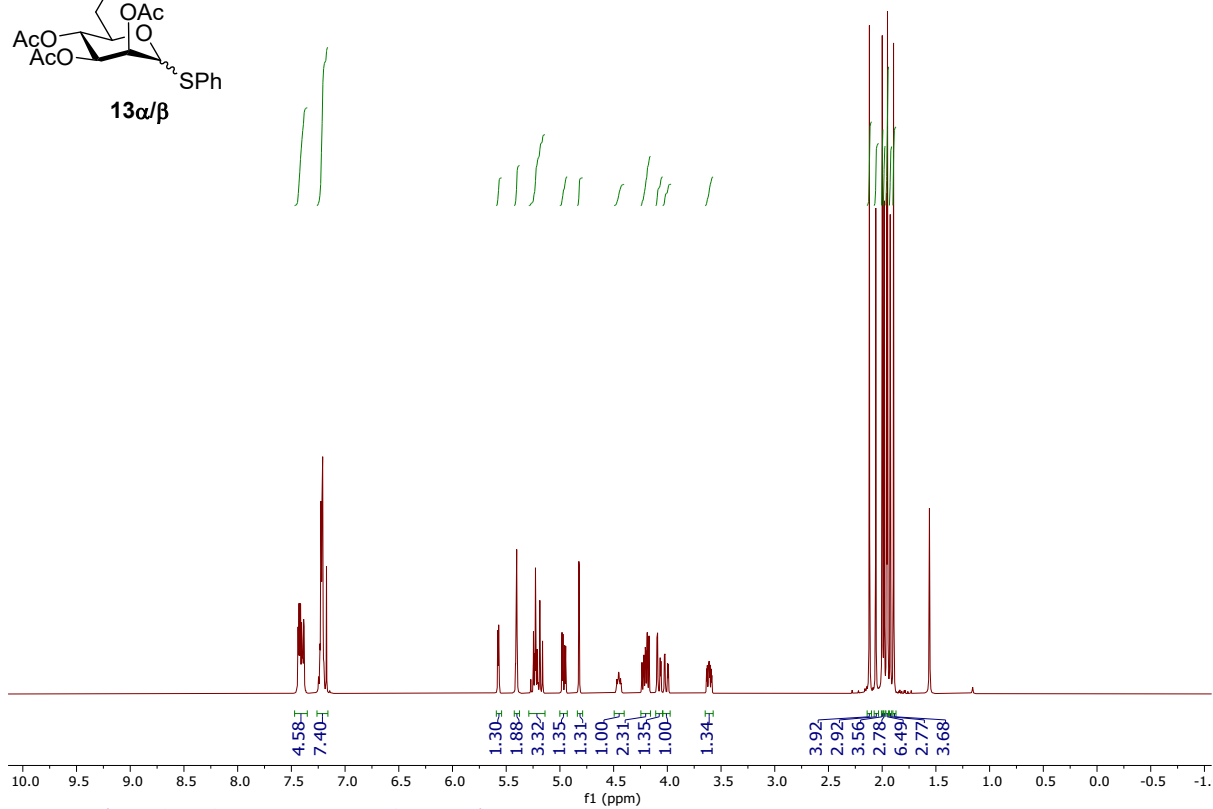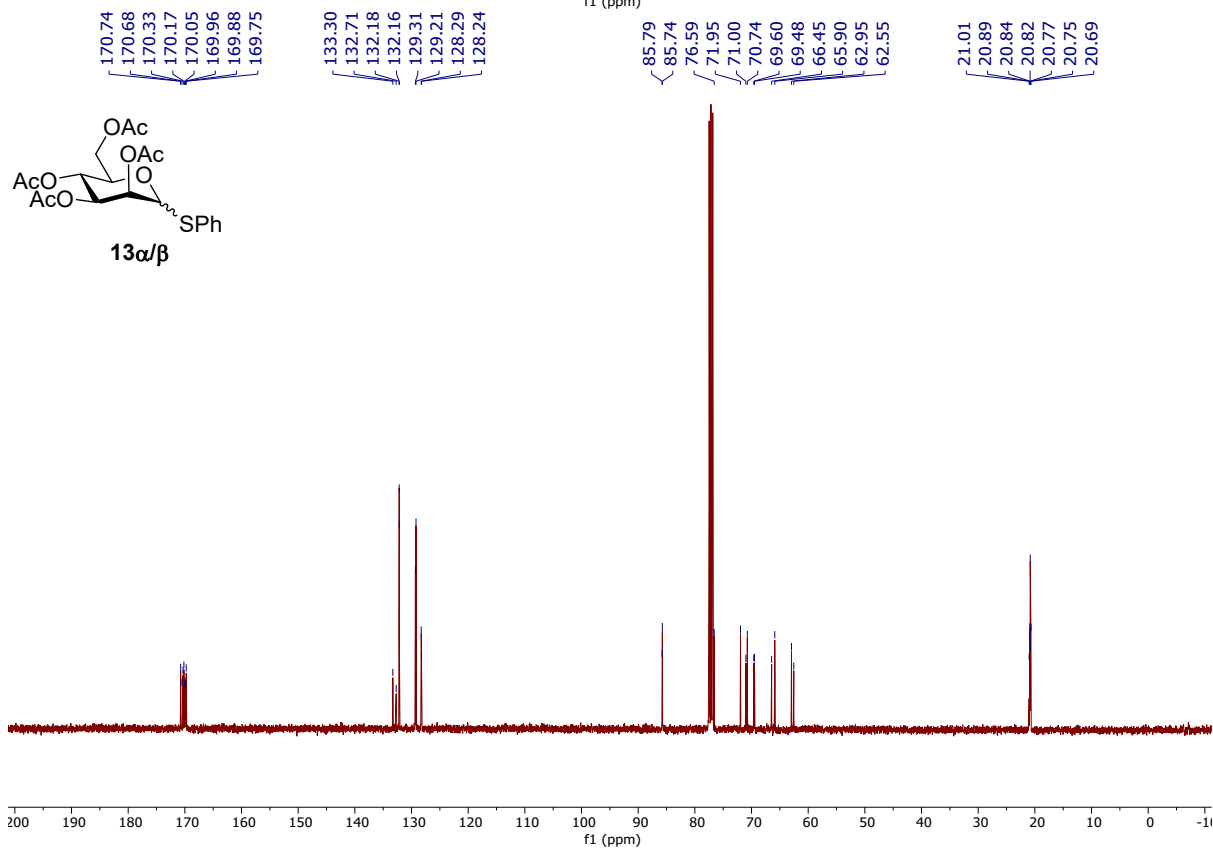

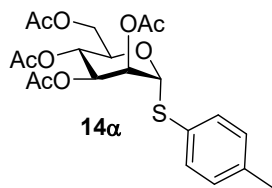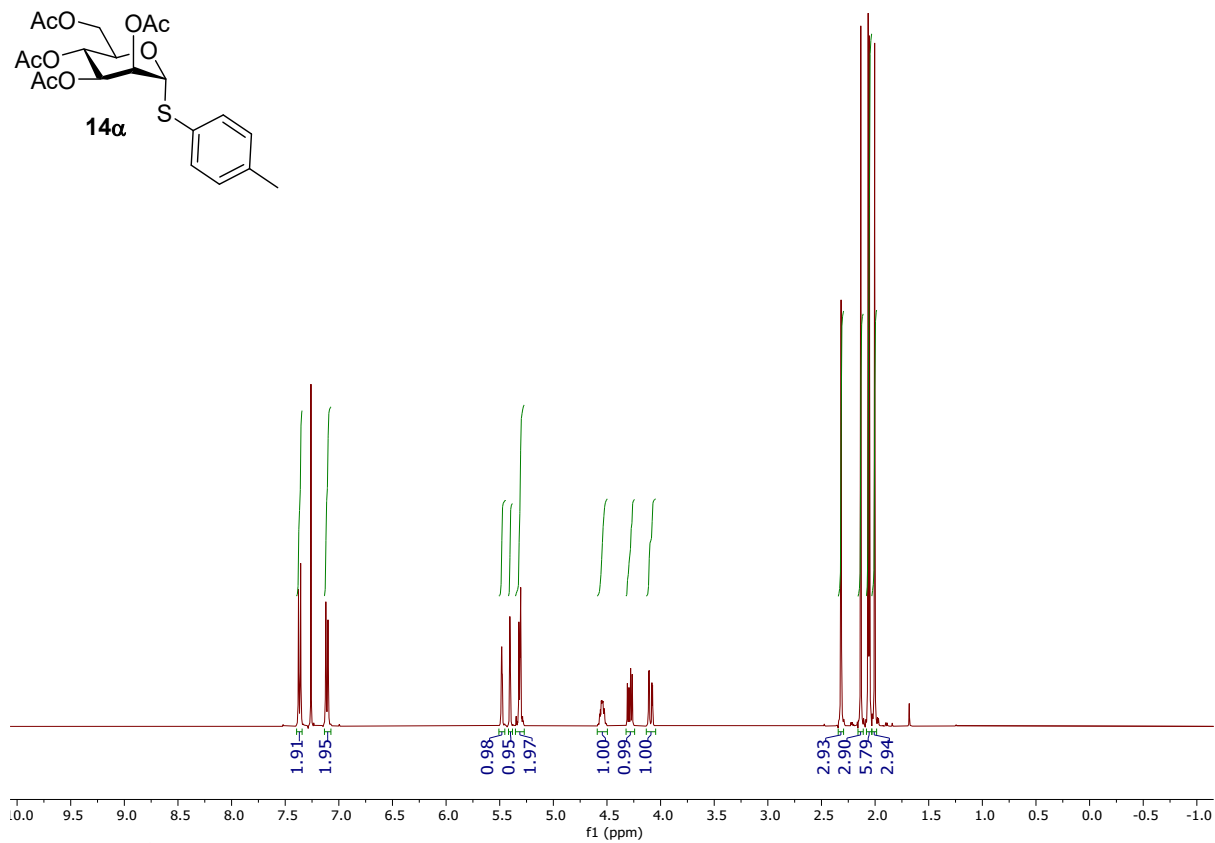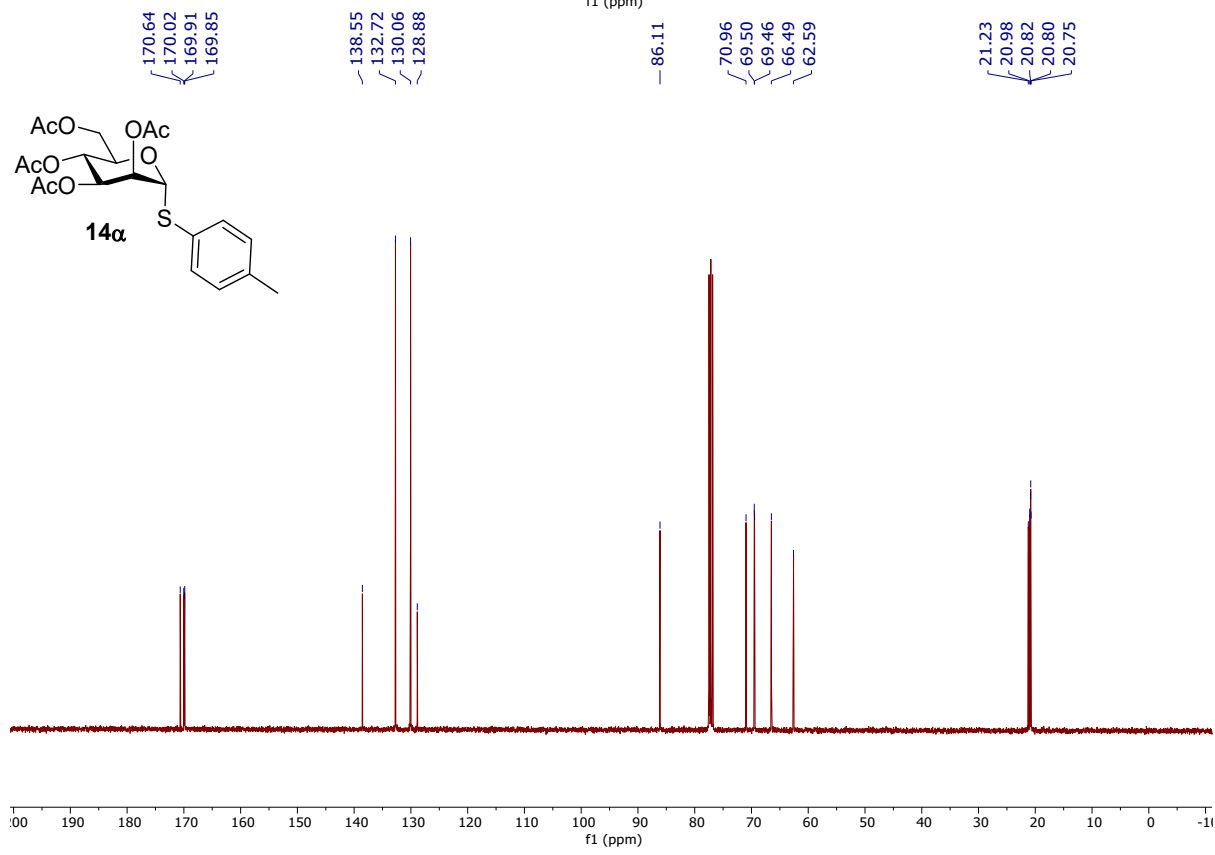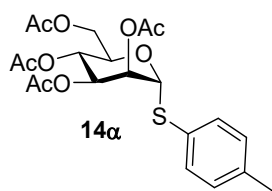

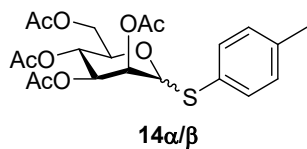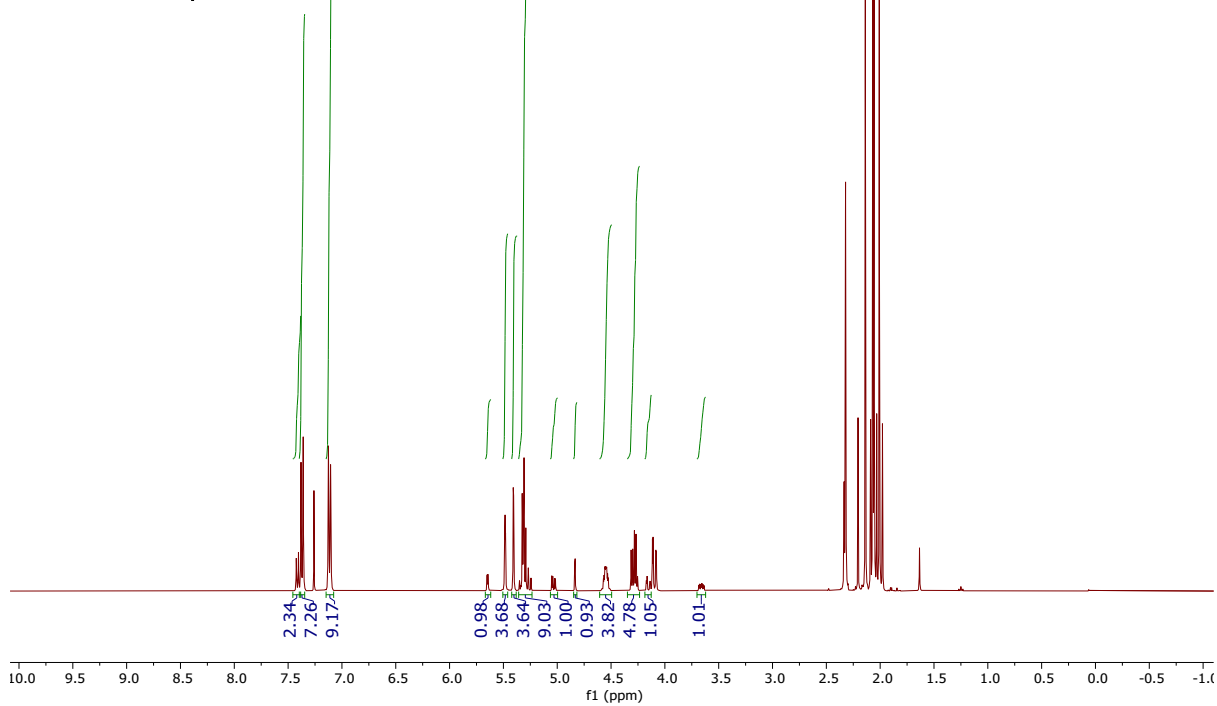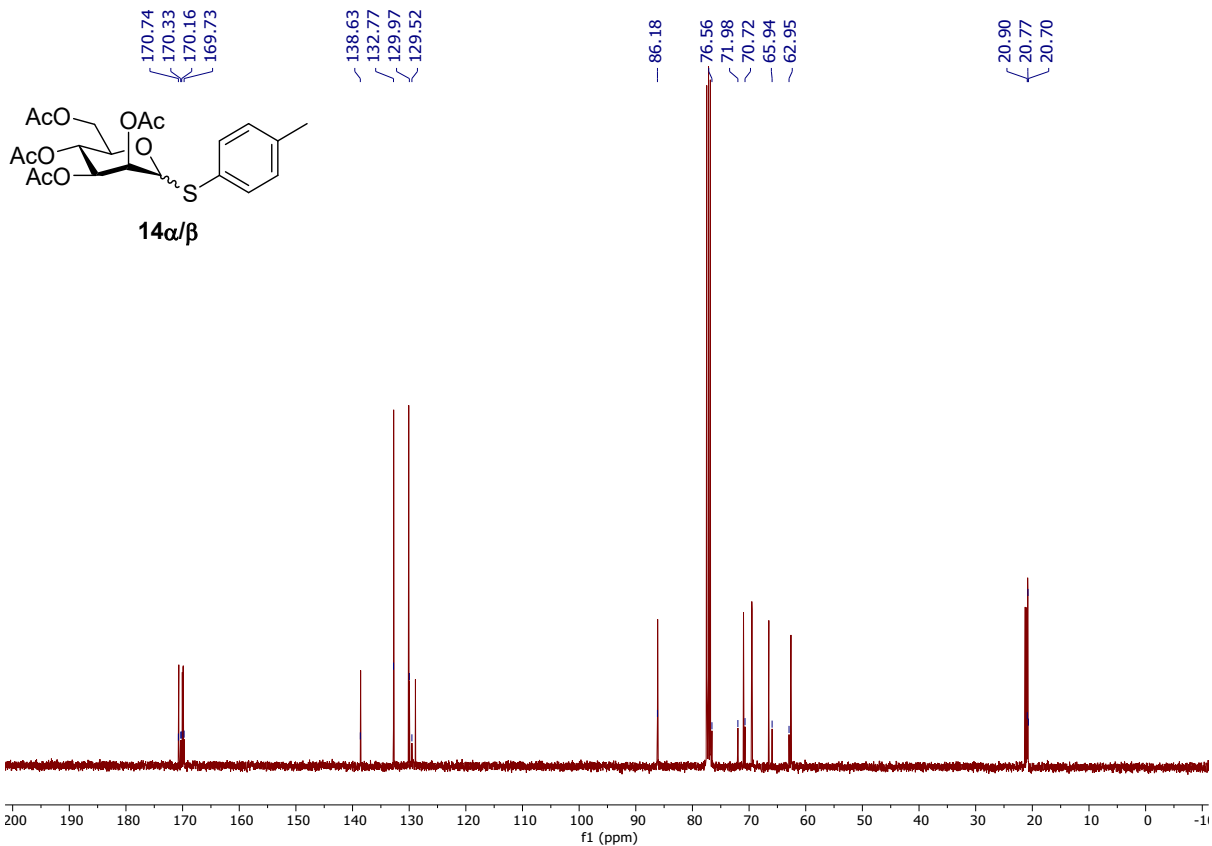

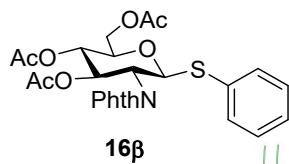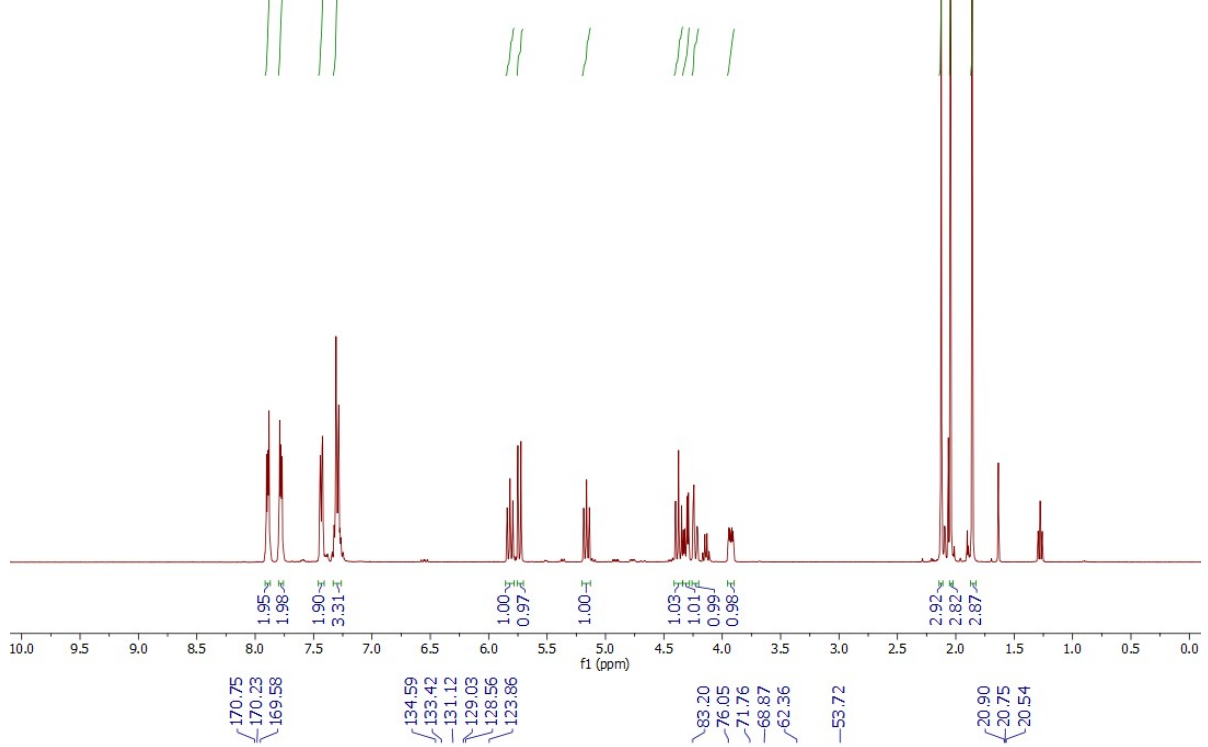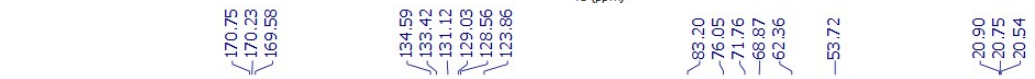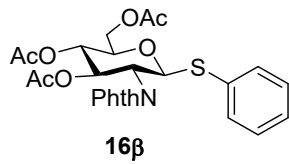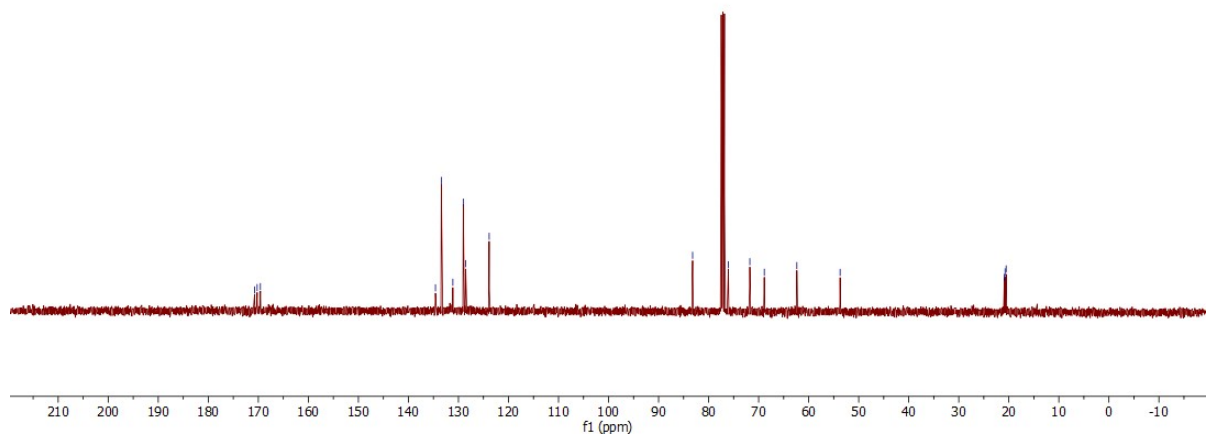

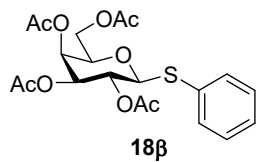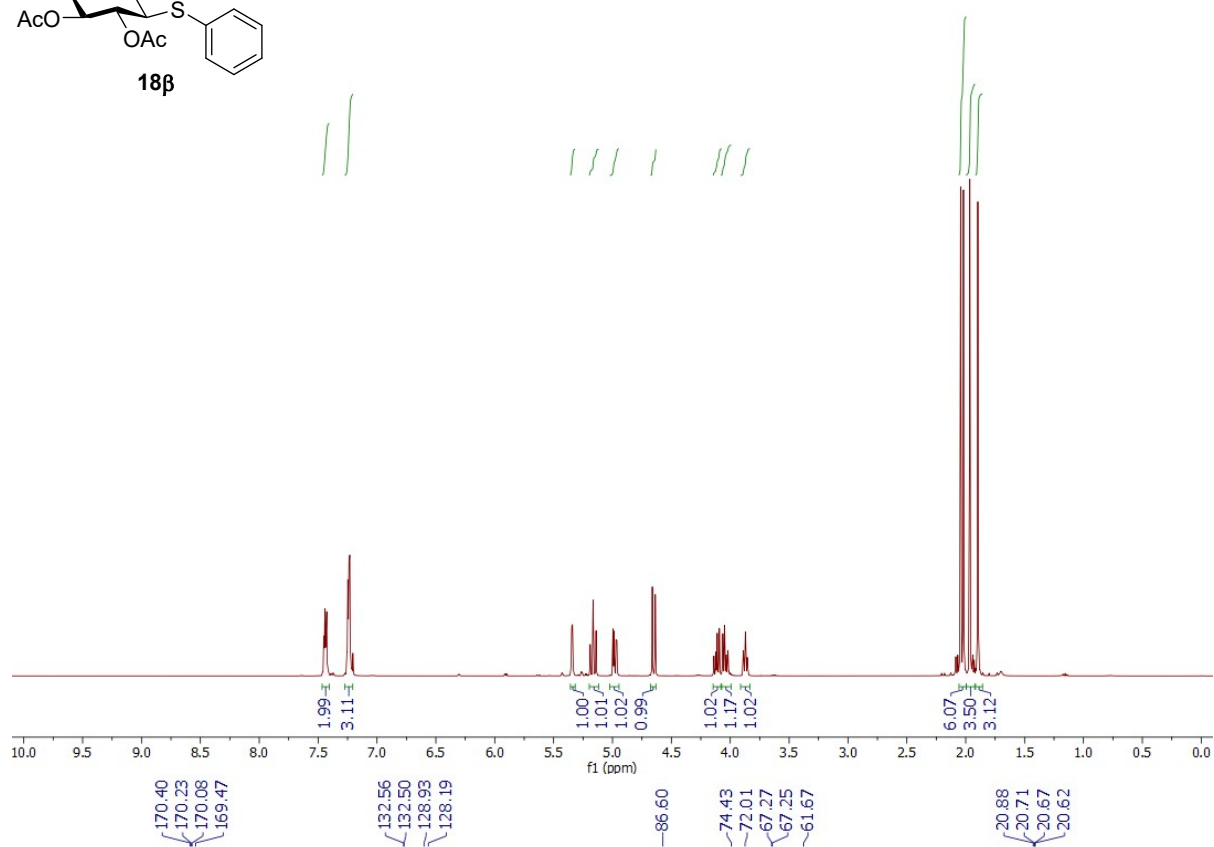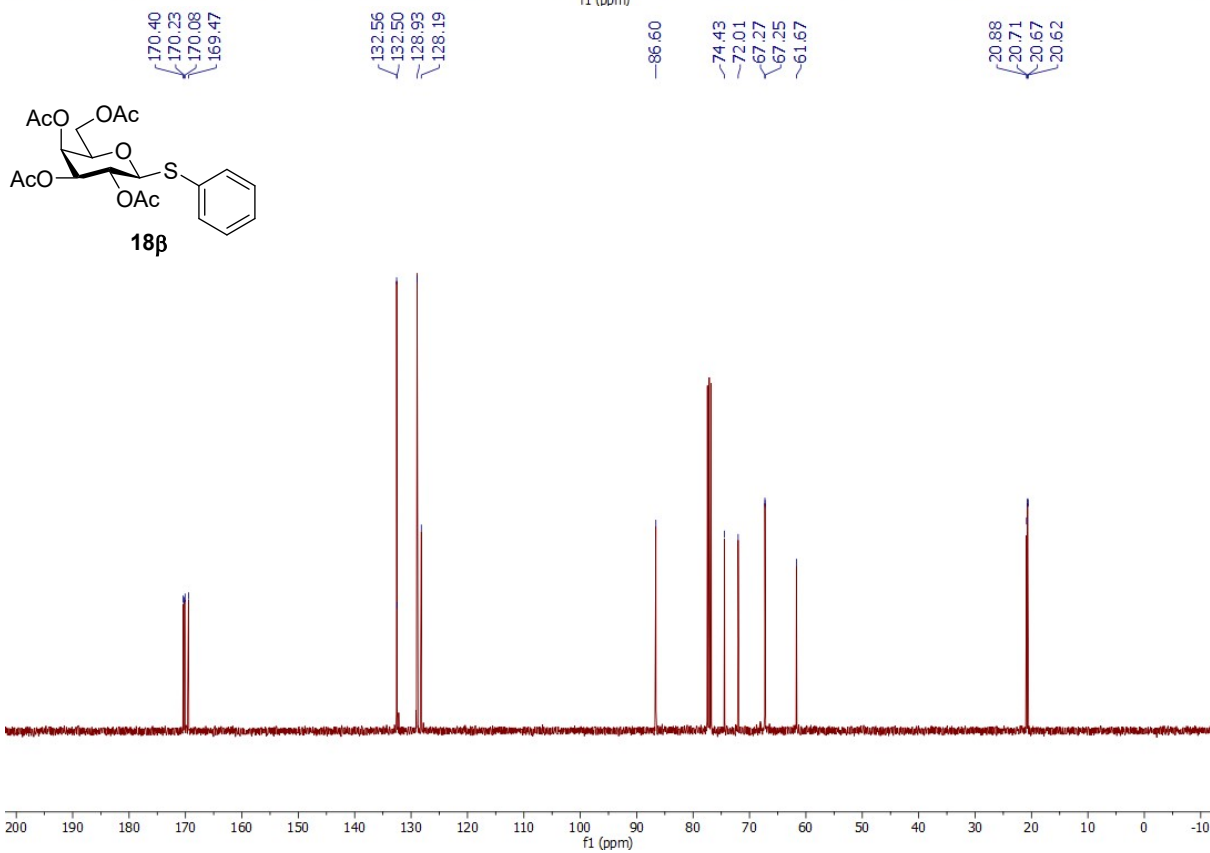

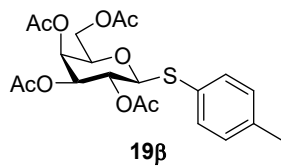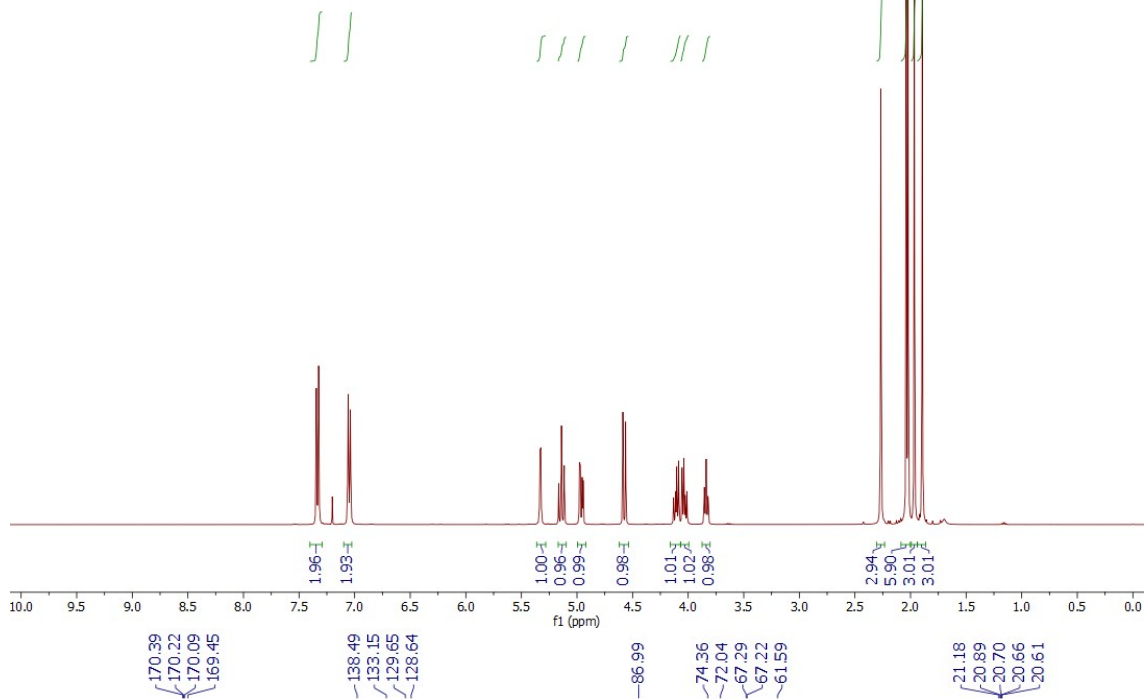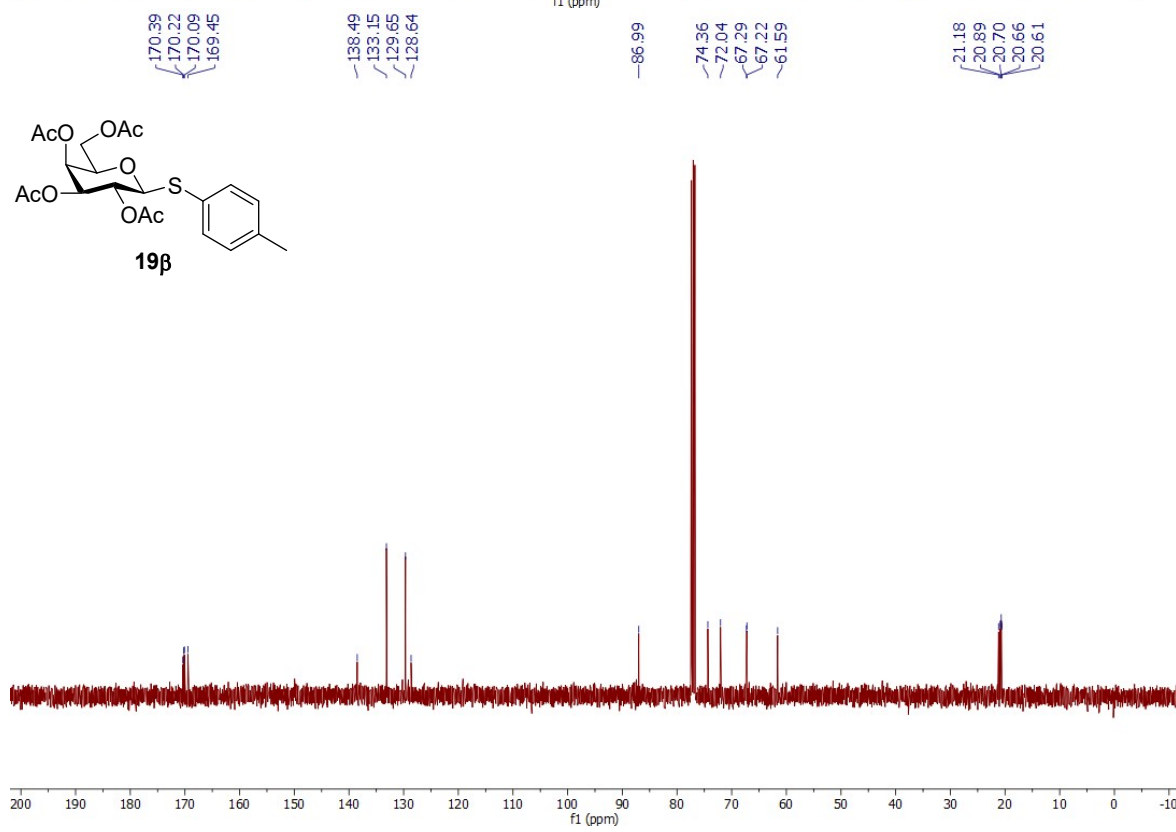

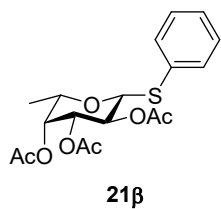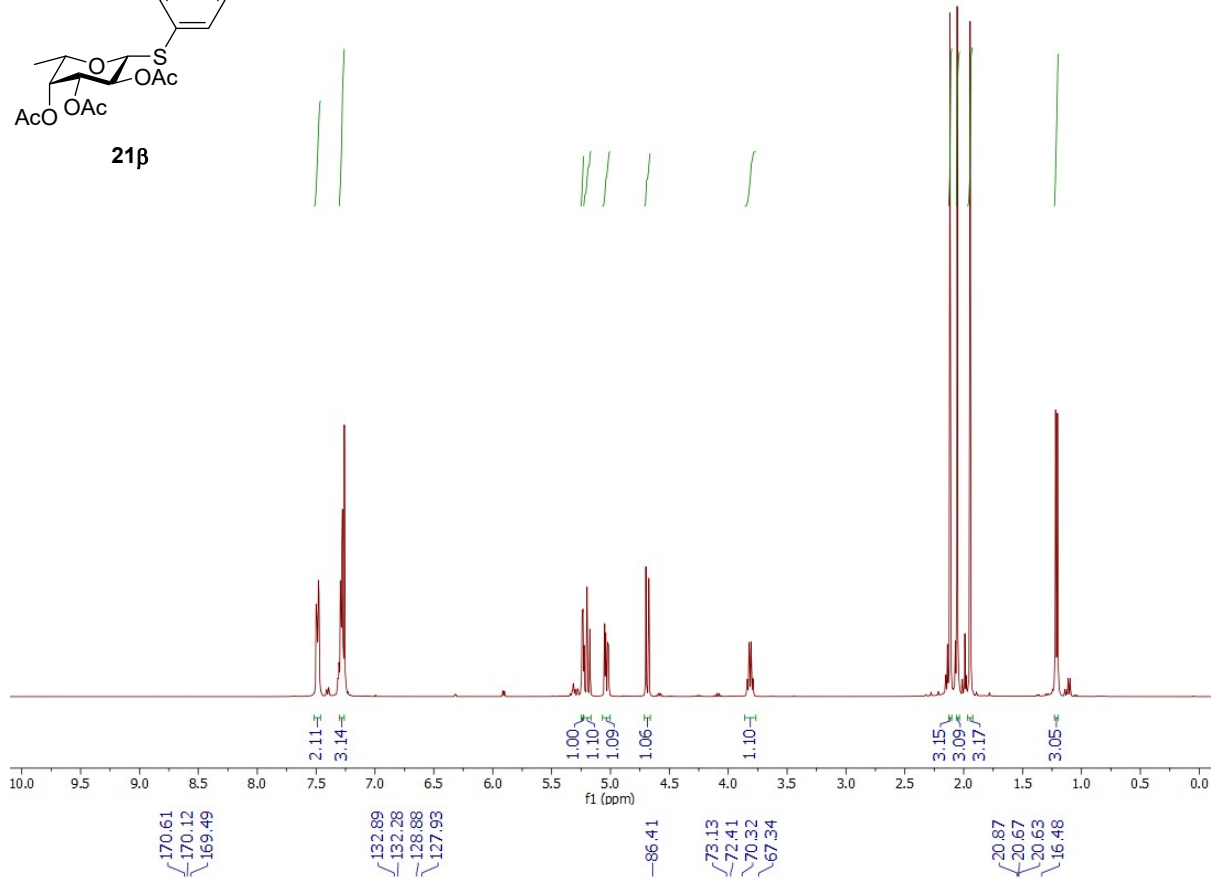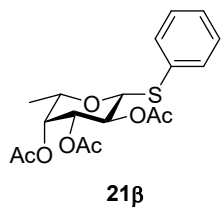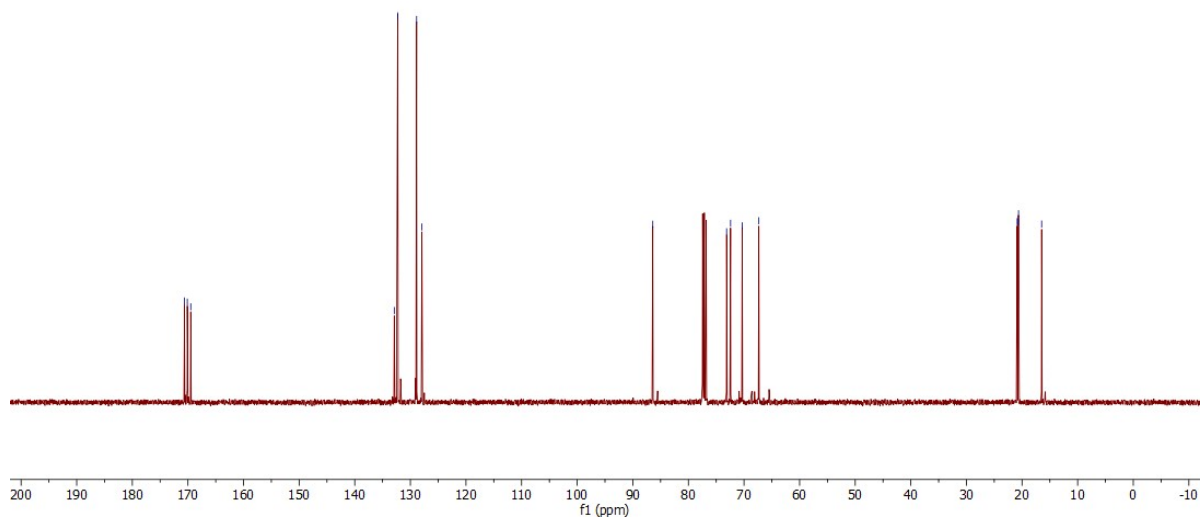

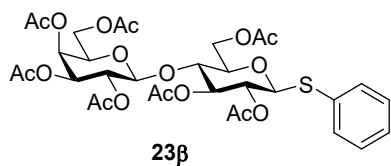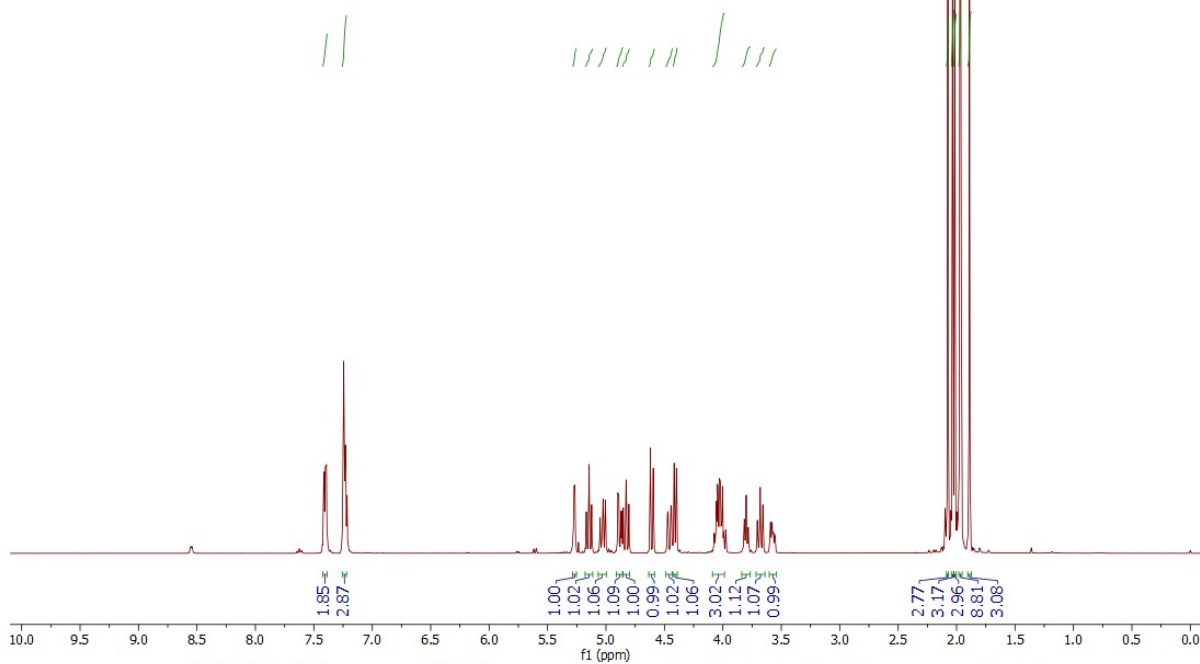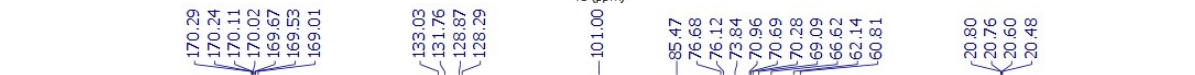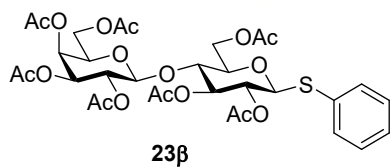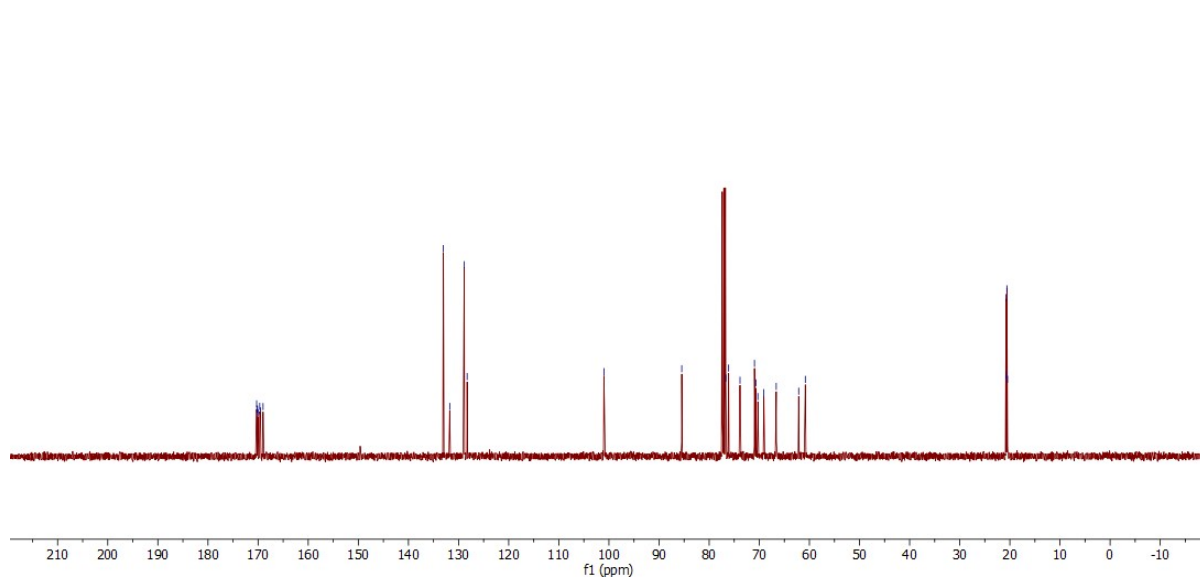



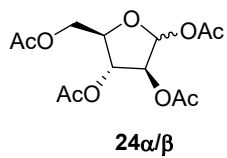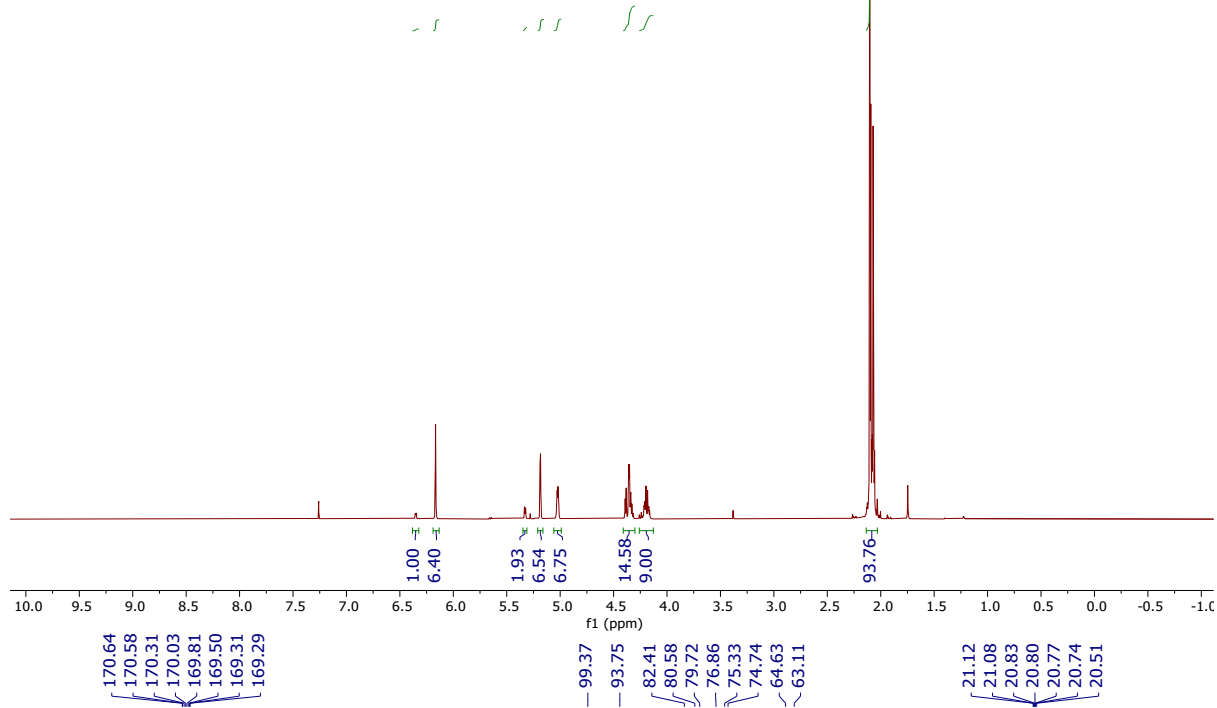

170.64  
 170.58  
 170.31  
 170.03  
 169.81  
 169.50  
 169.31  
 169.29

99.37  
 93.75  
 82.41  
 80.58  
 79.72  
 76.86  
 75.33  
 74.74  
 64.63  
 63.11

21.12  
 21.08  
 20.83  
 20.80  
 20.77  
 20.74  
 20.51

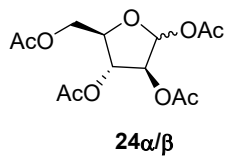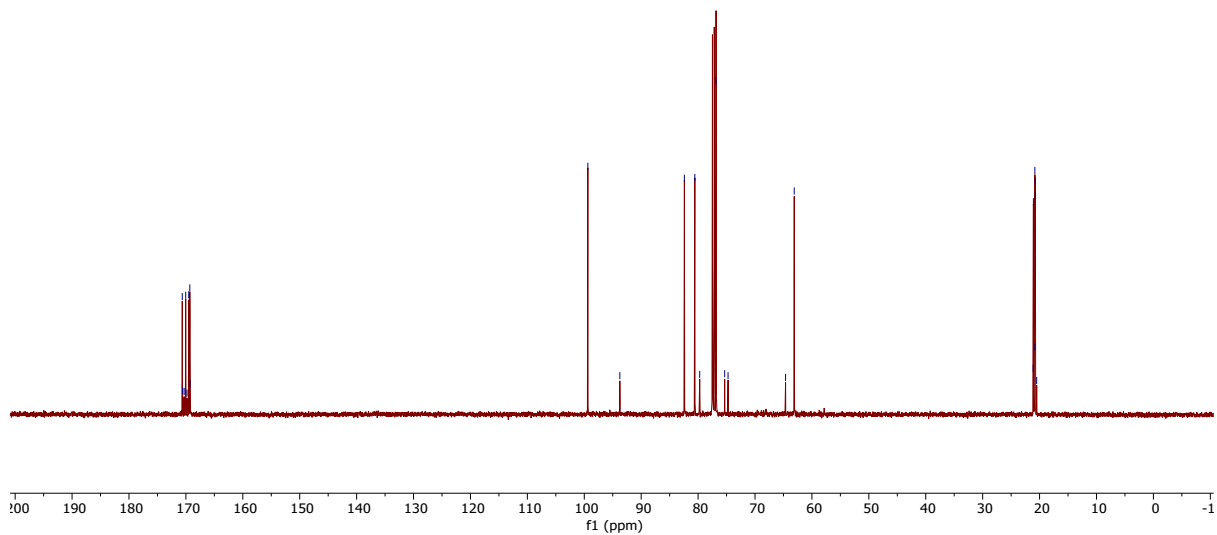

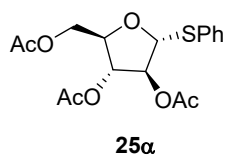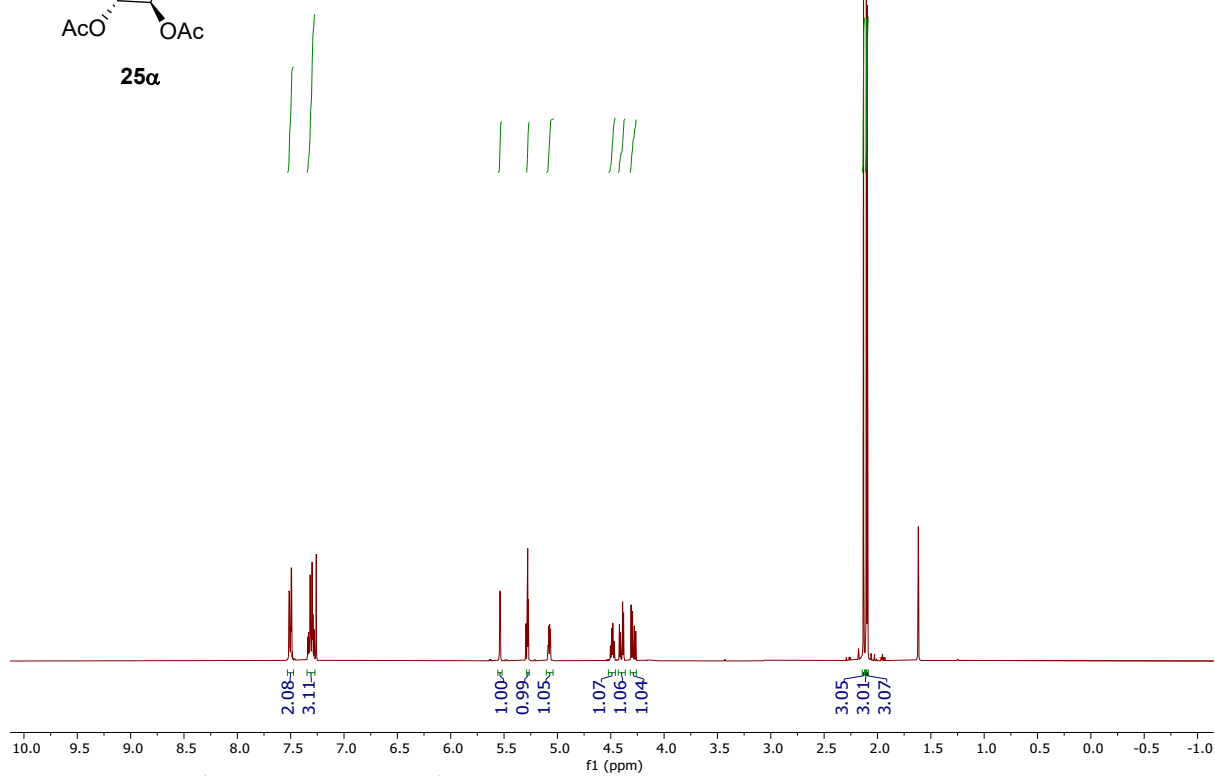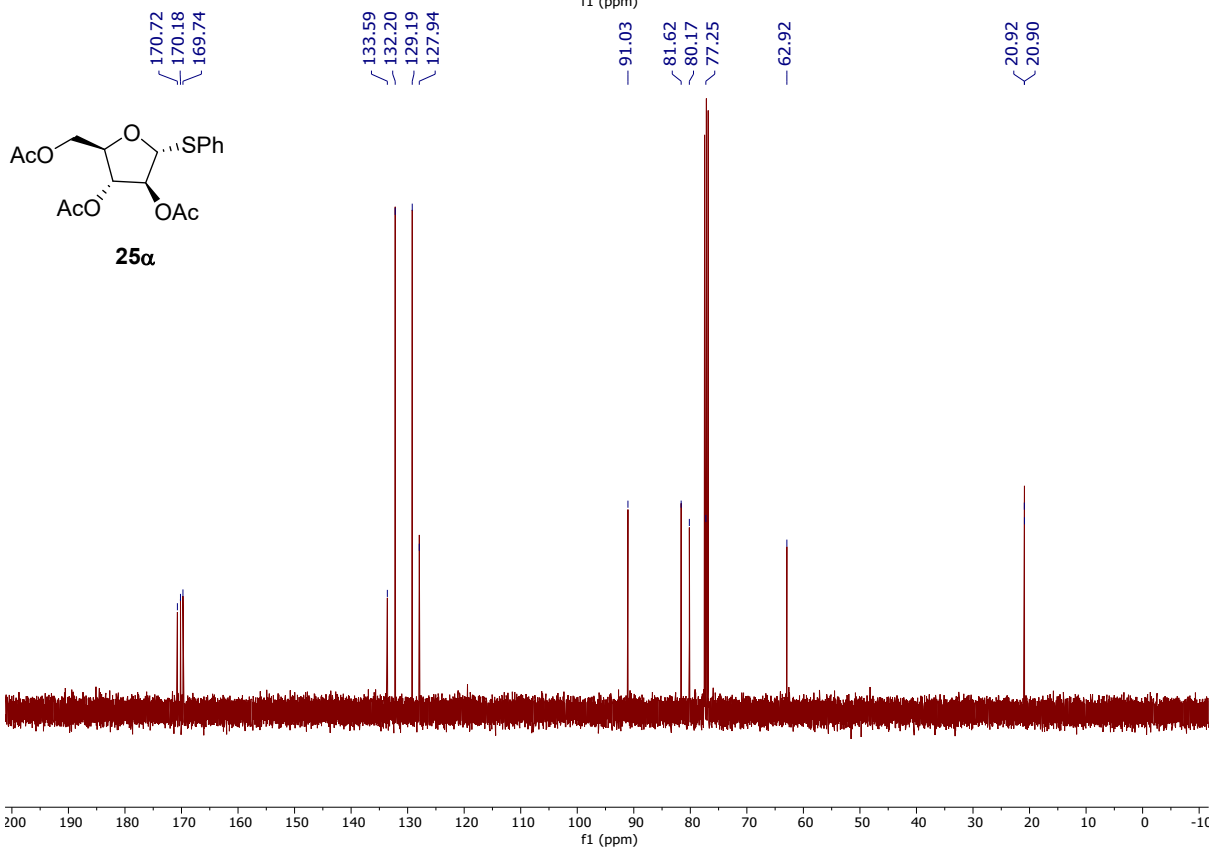

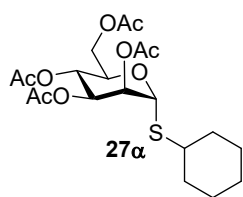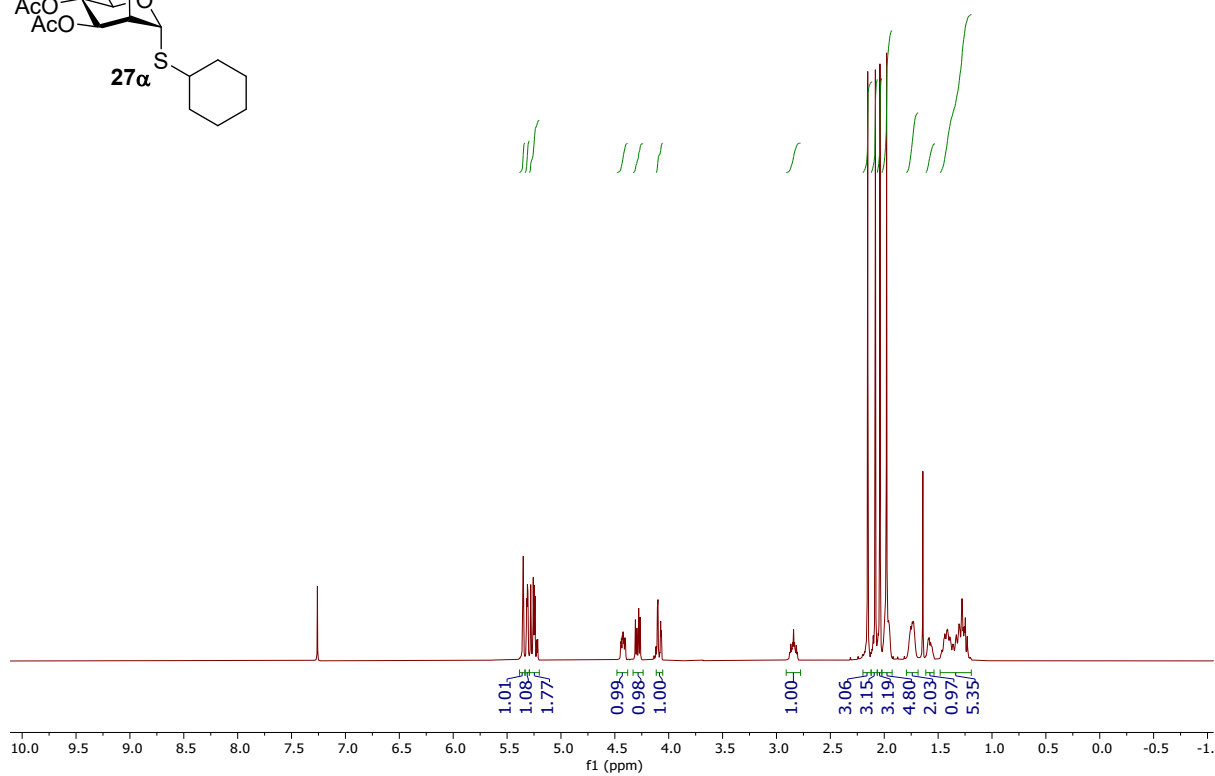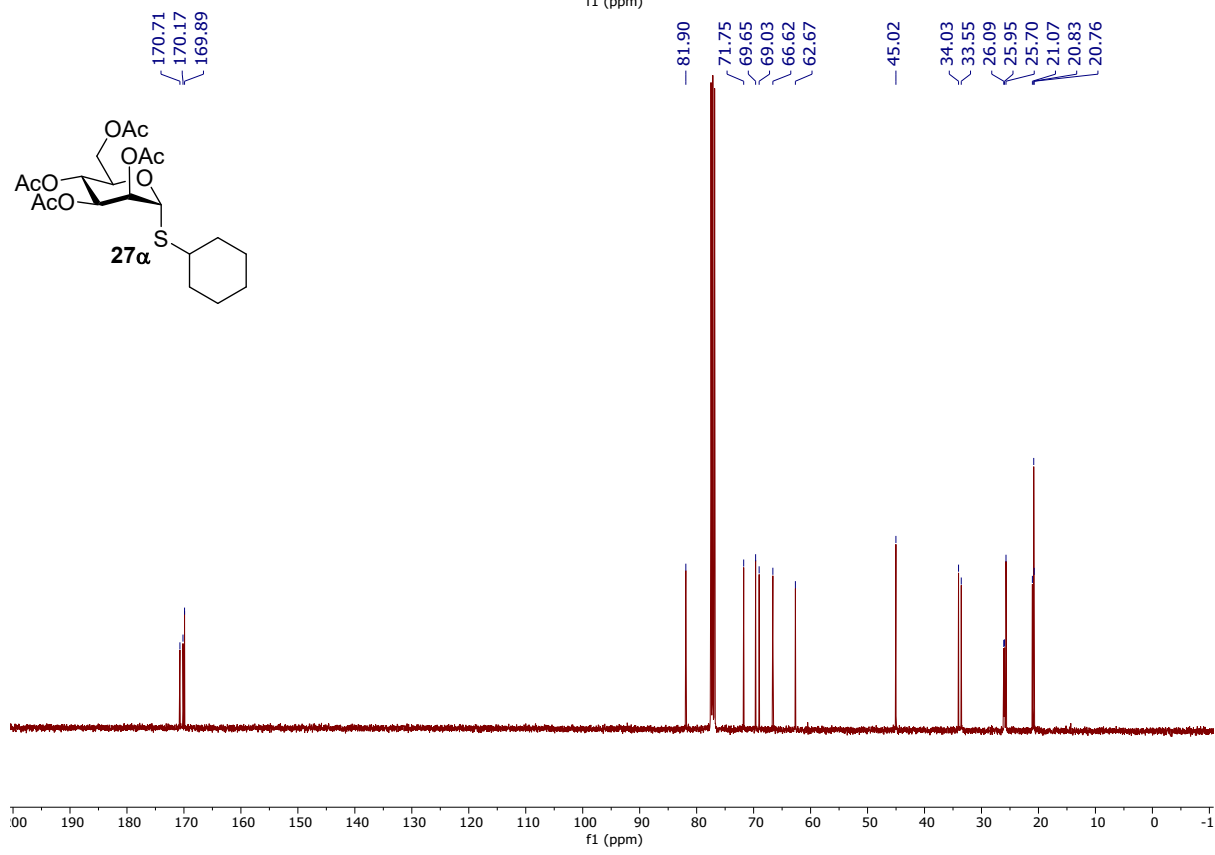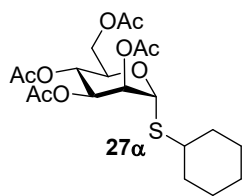

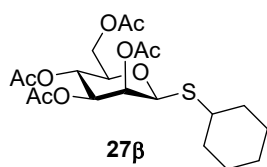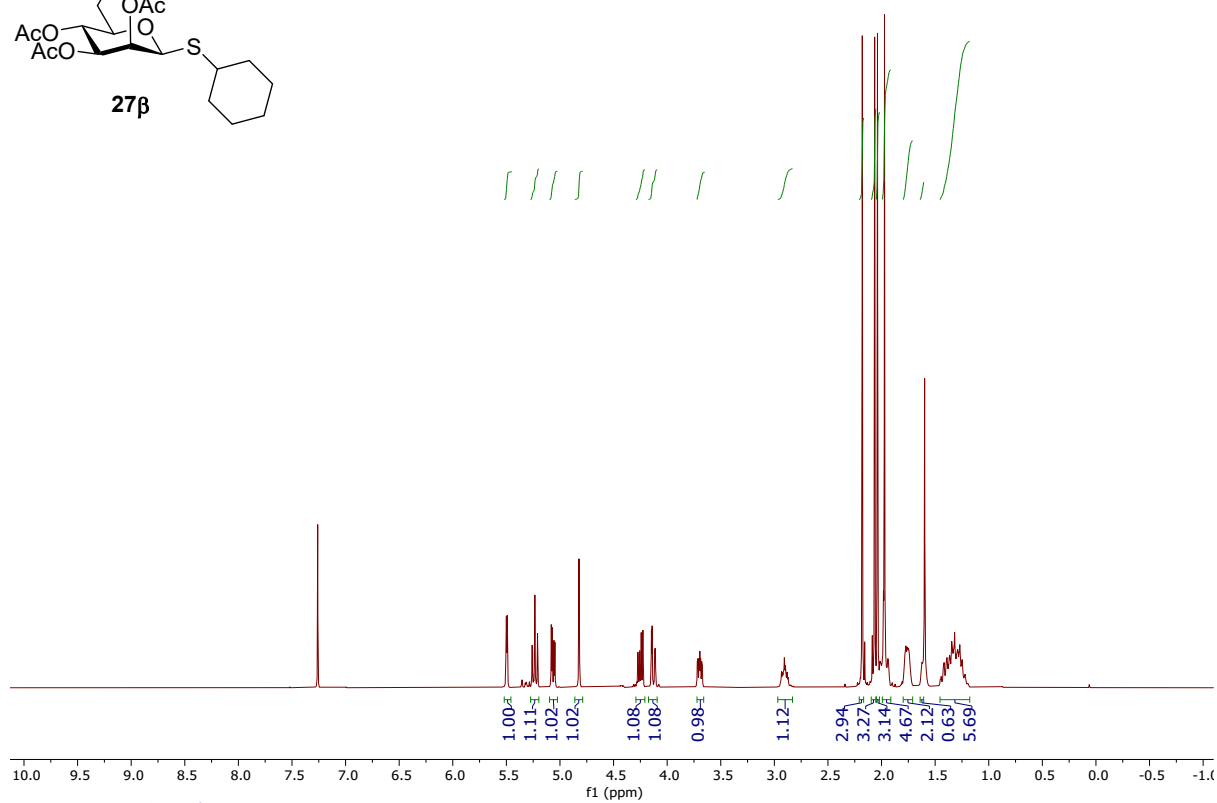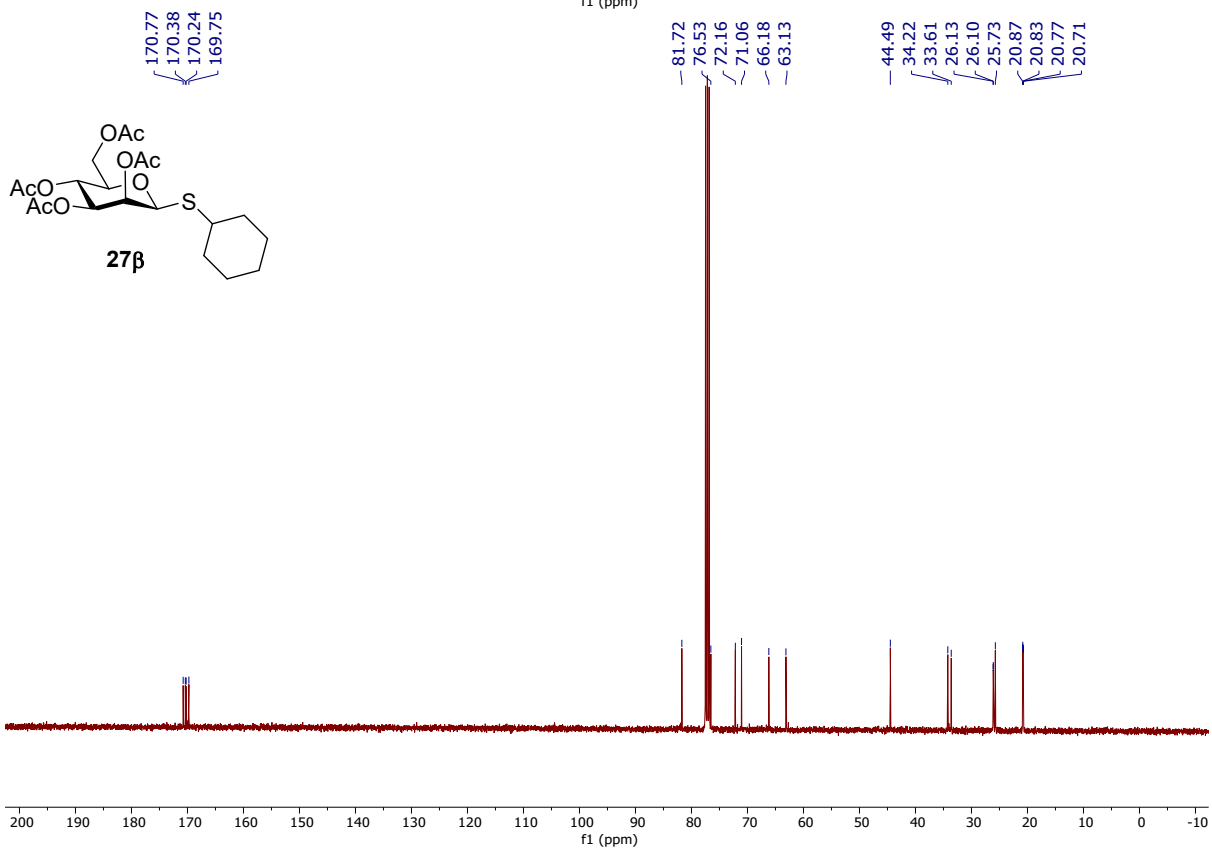

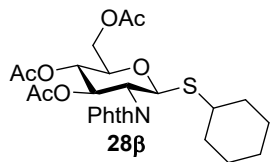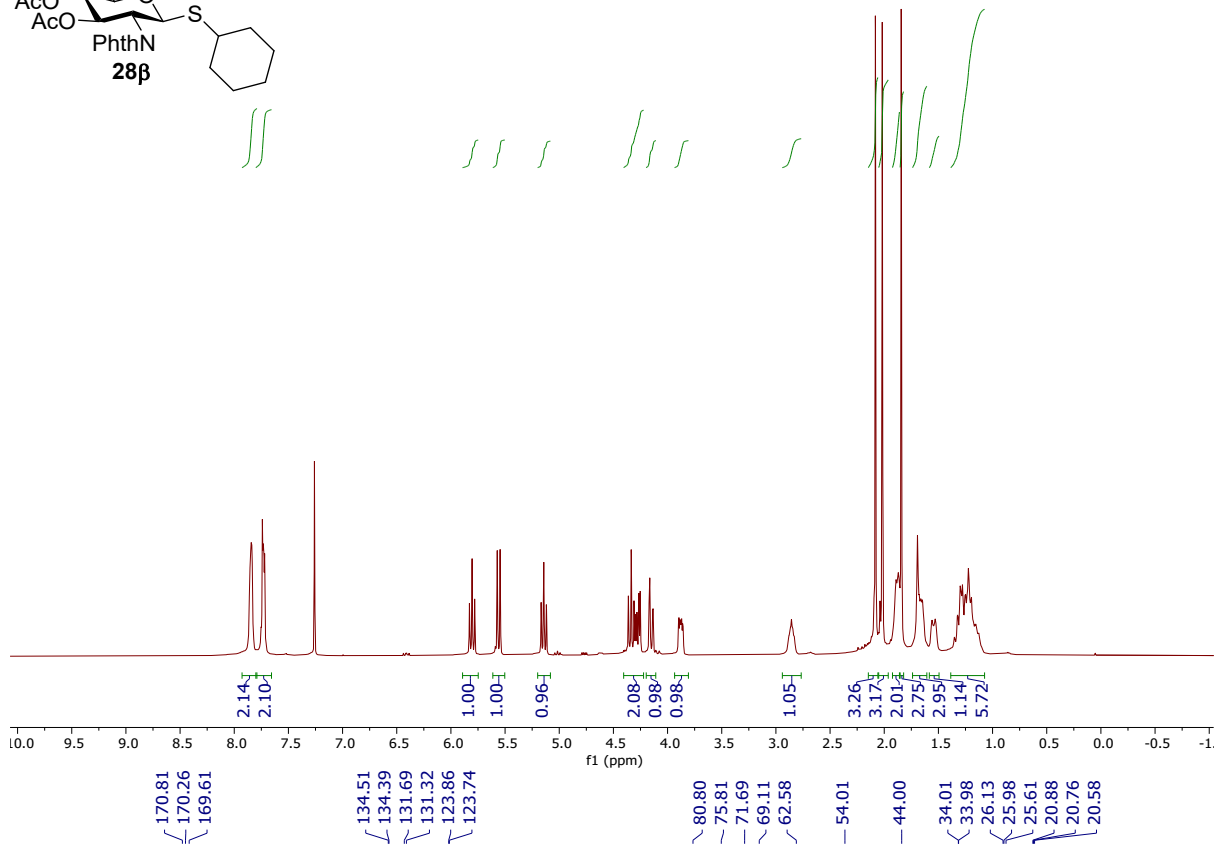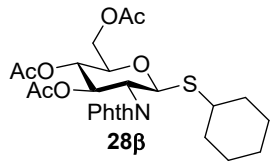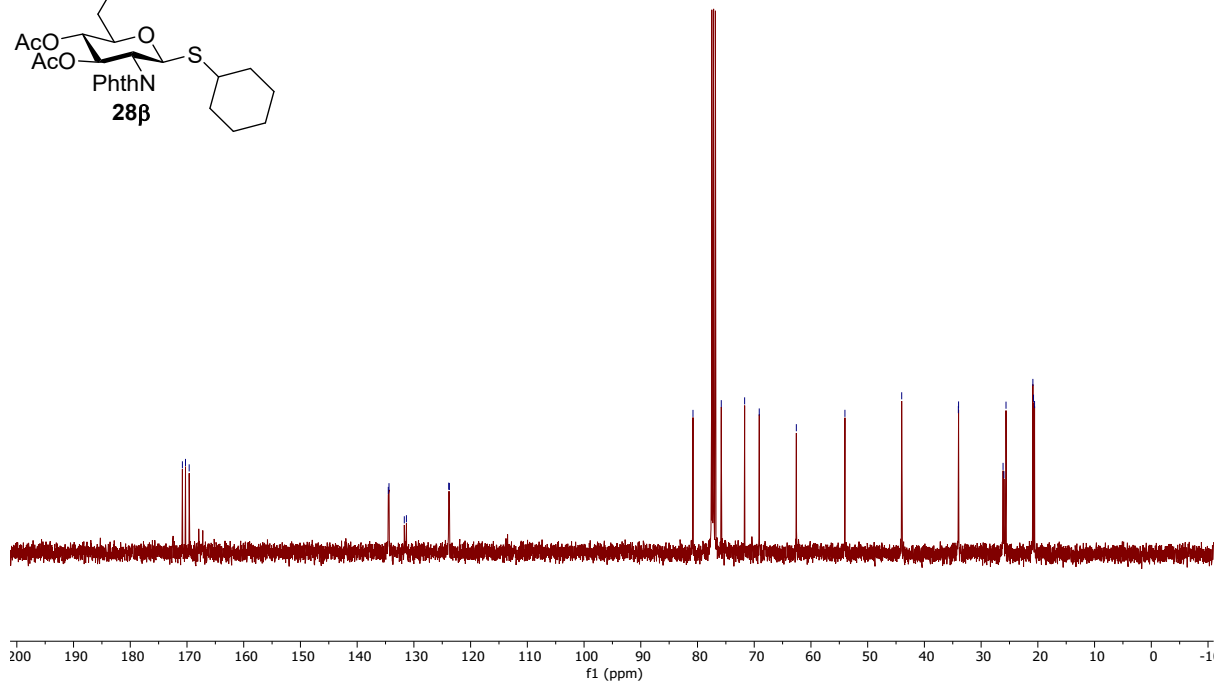

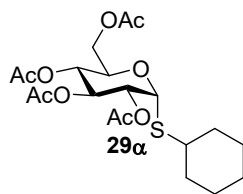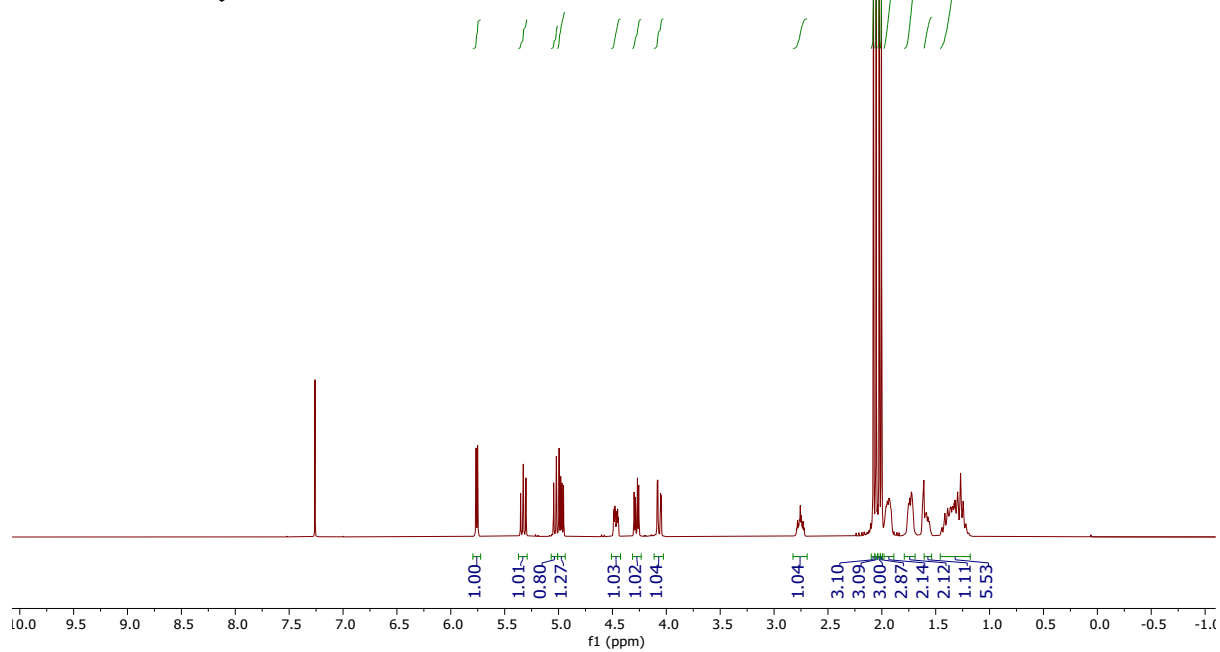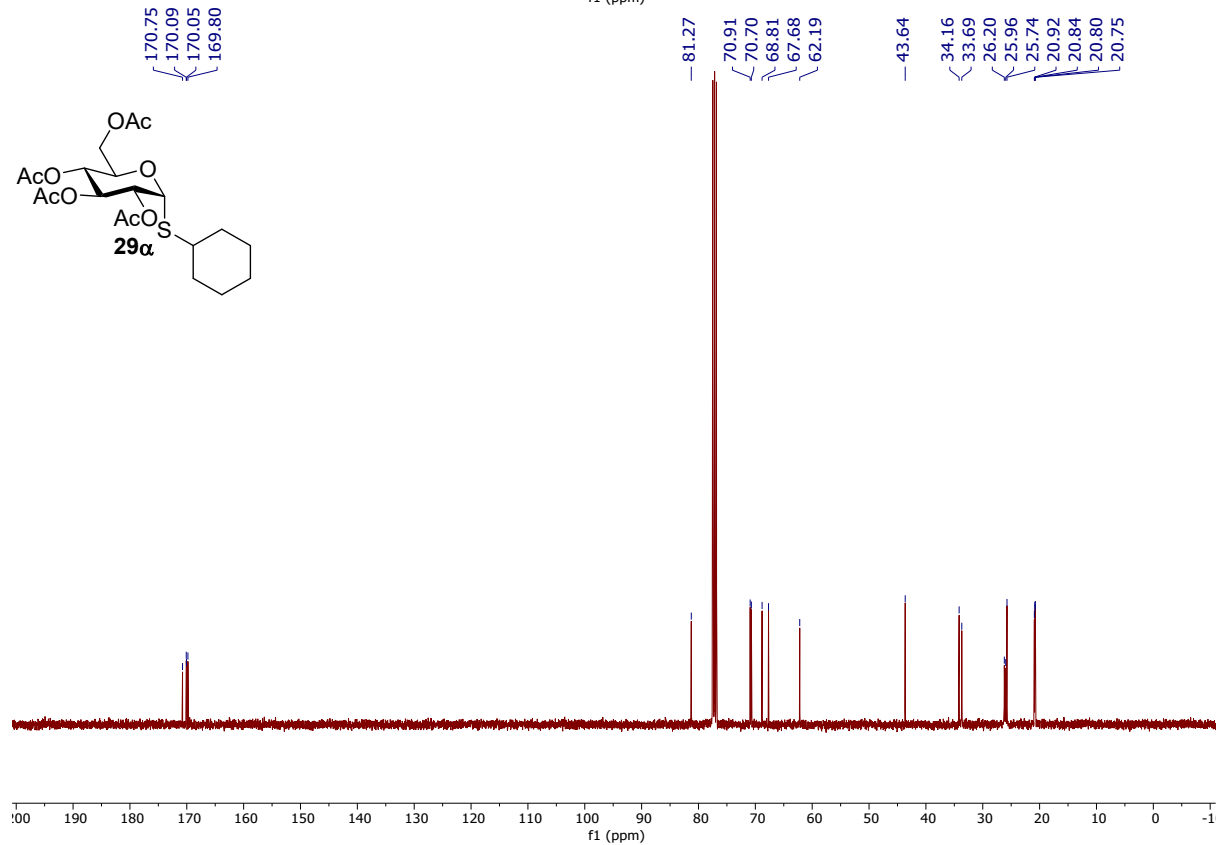

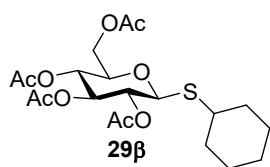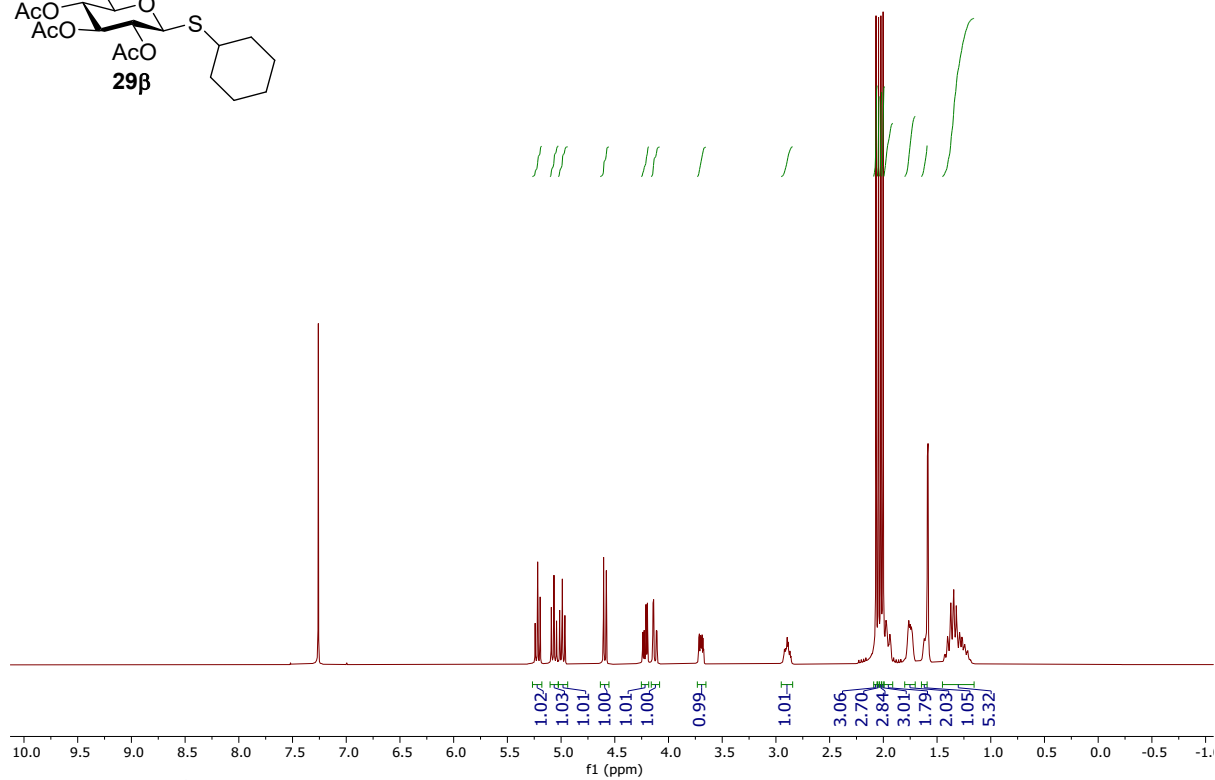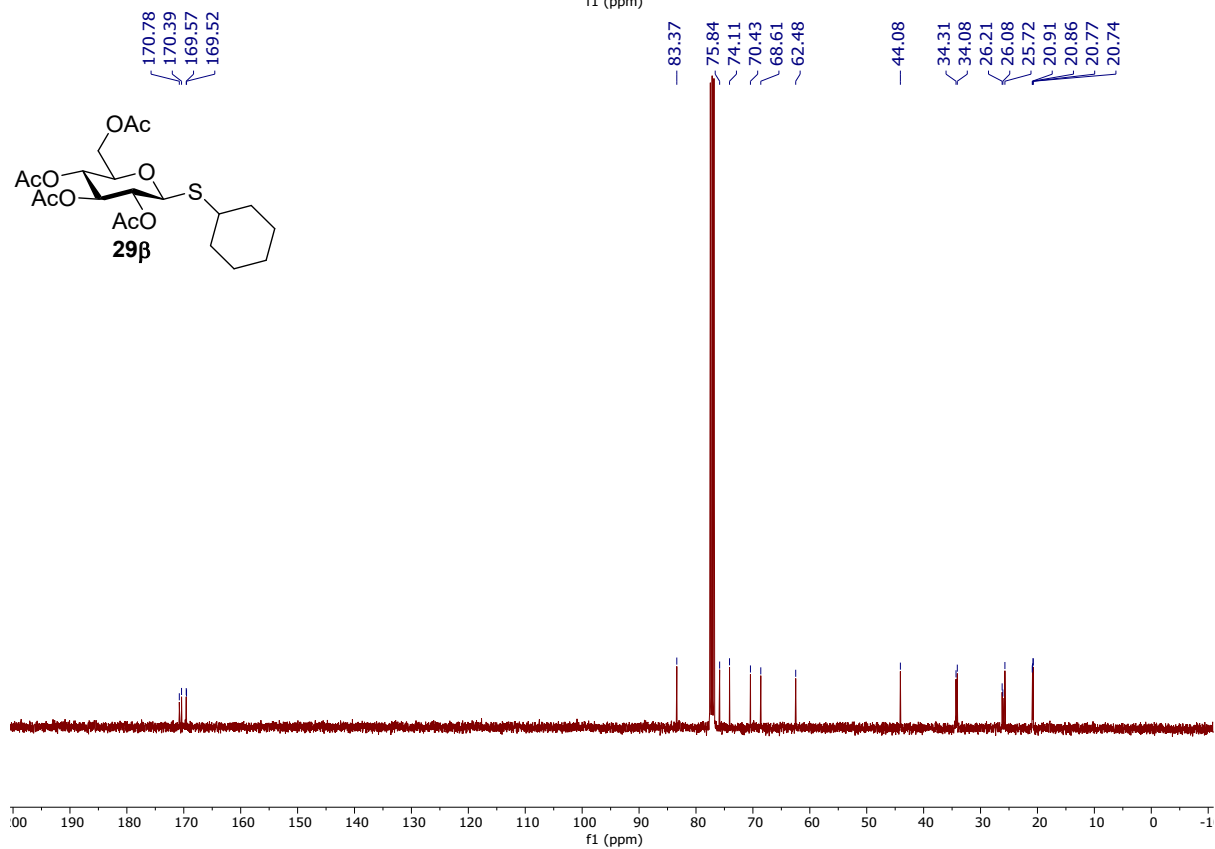

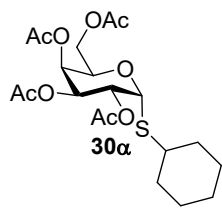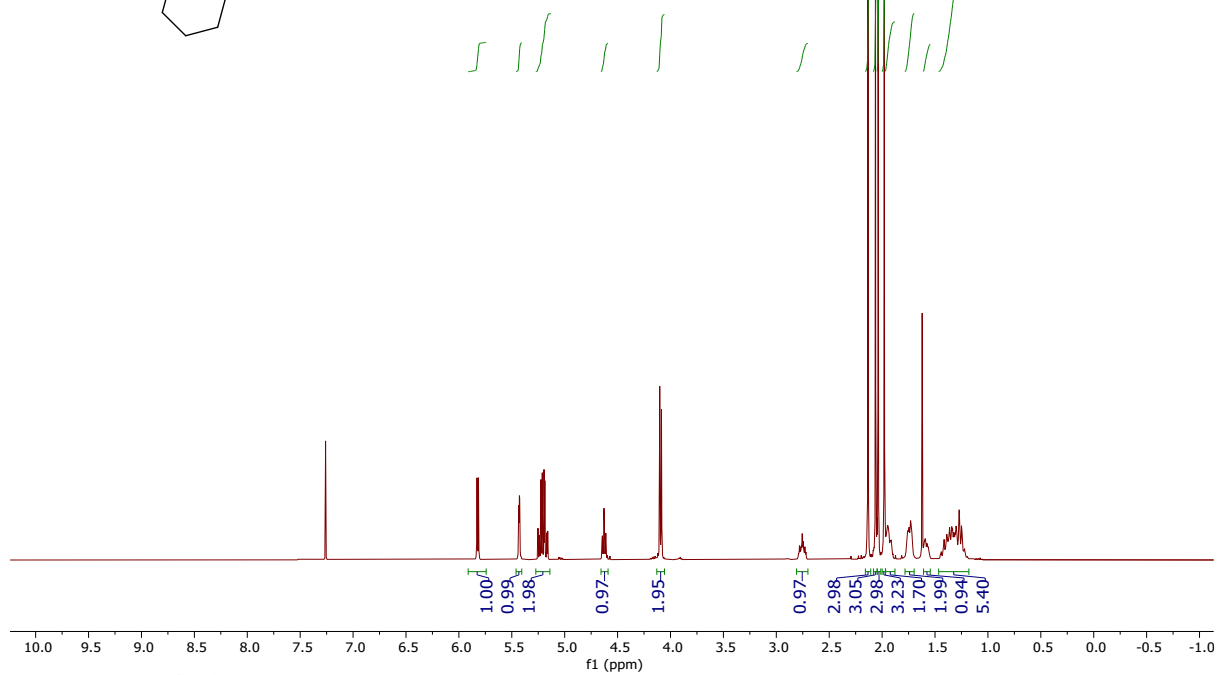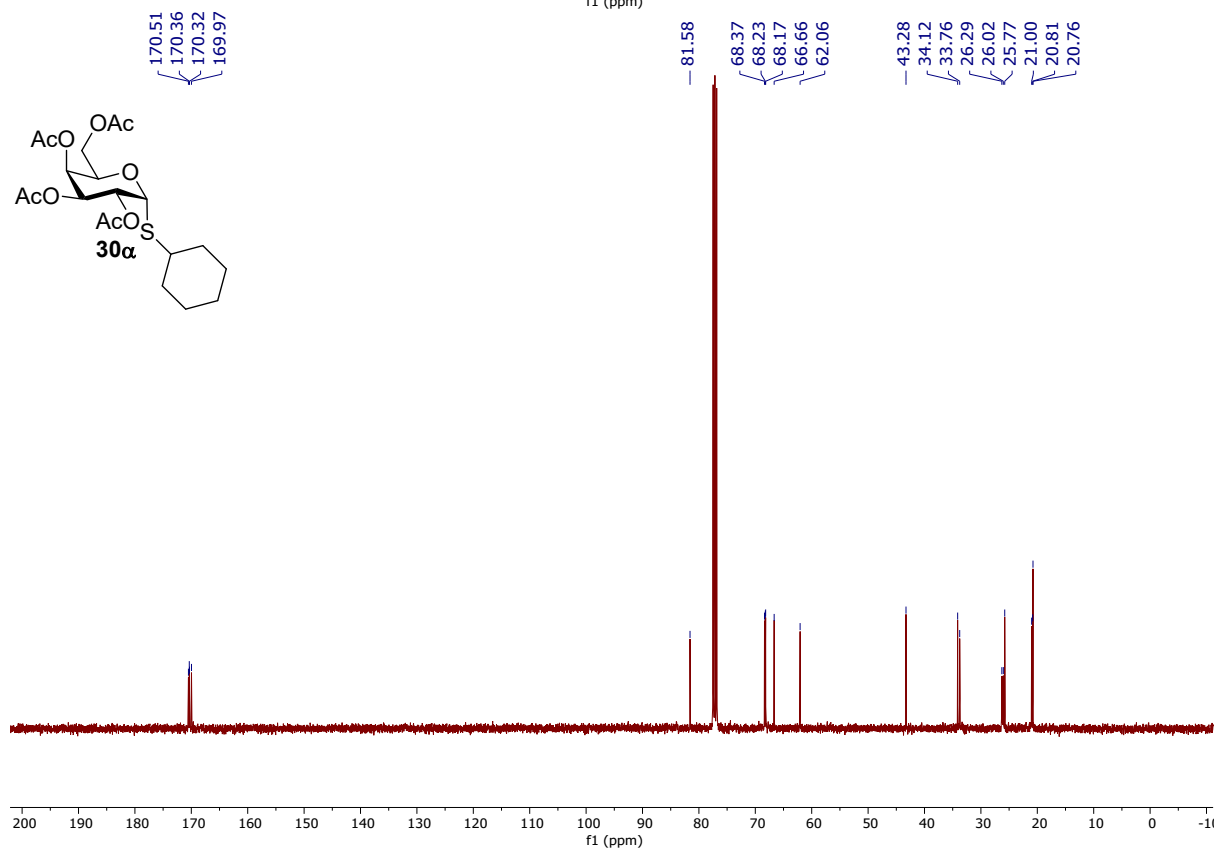



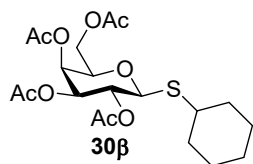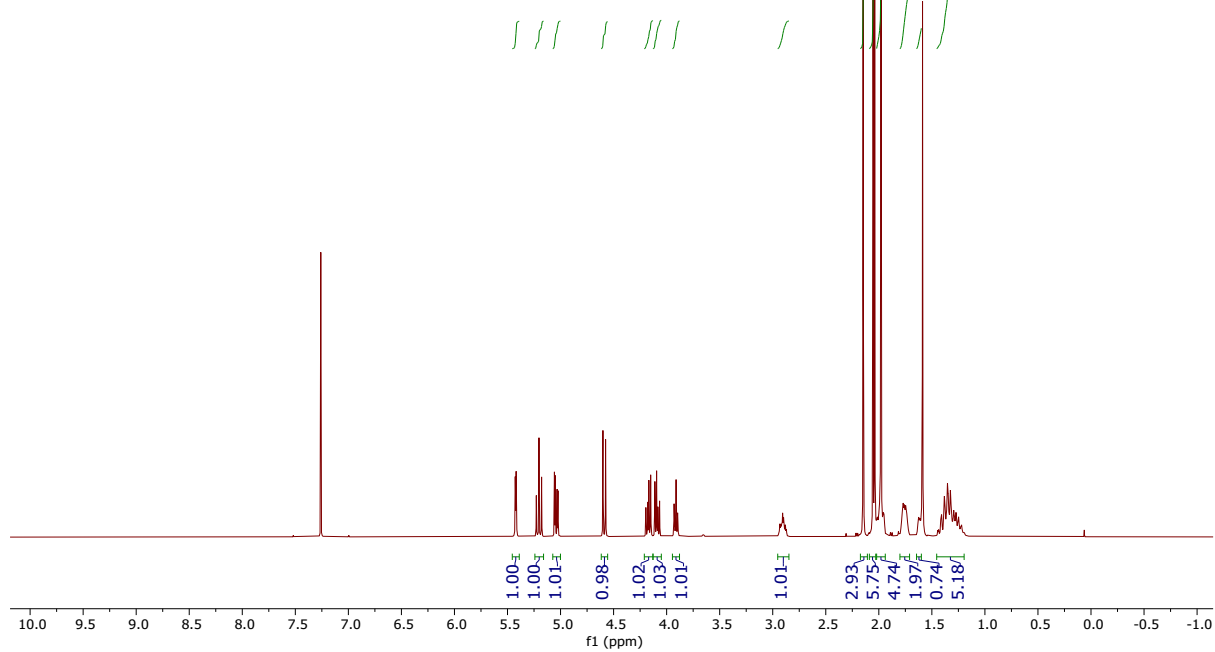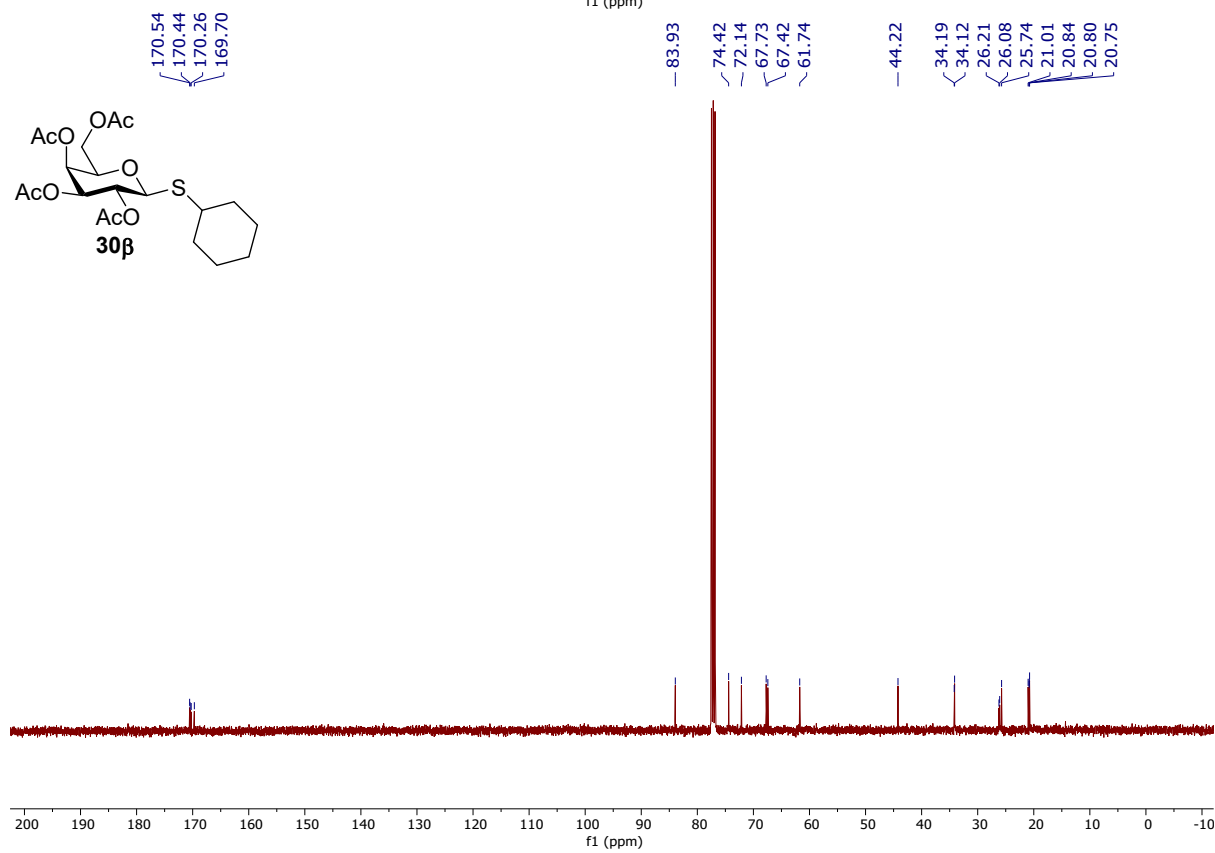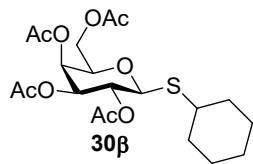

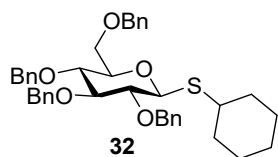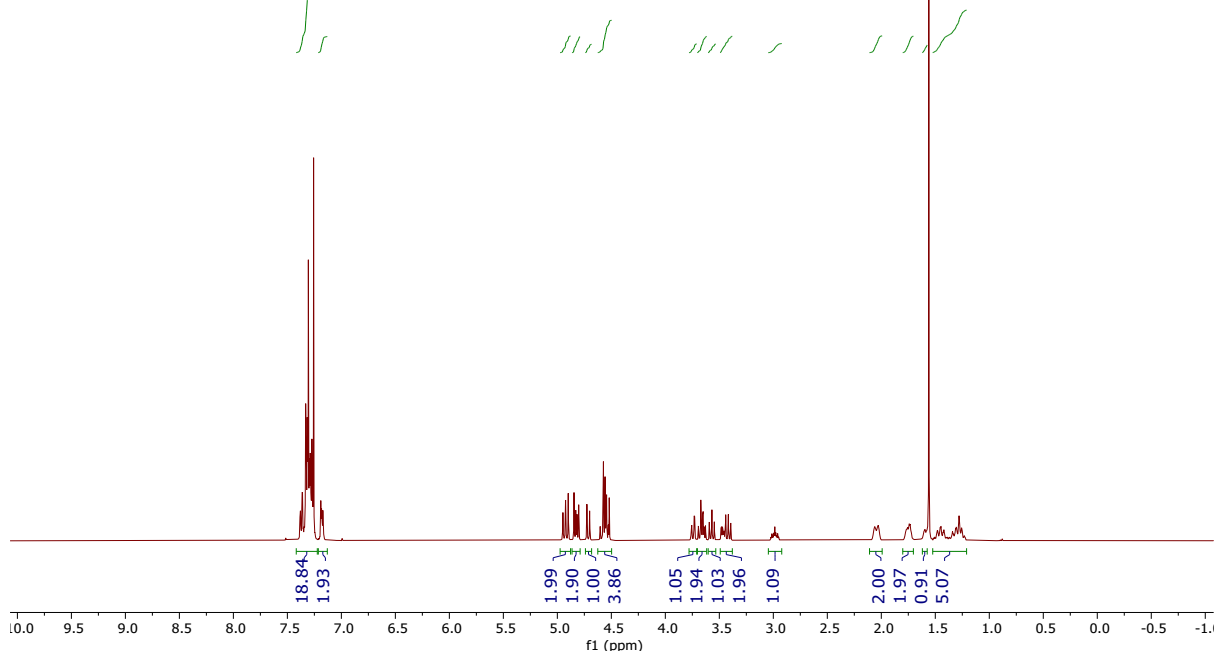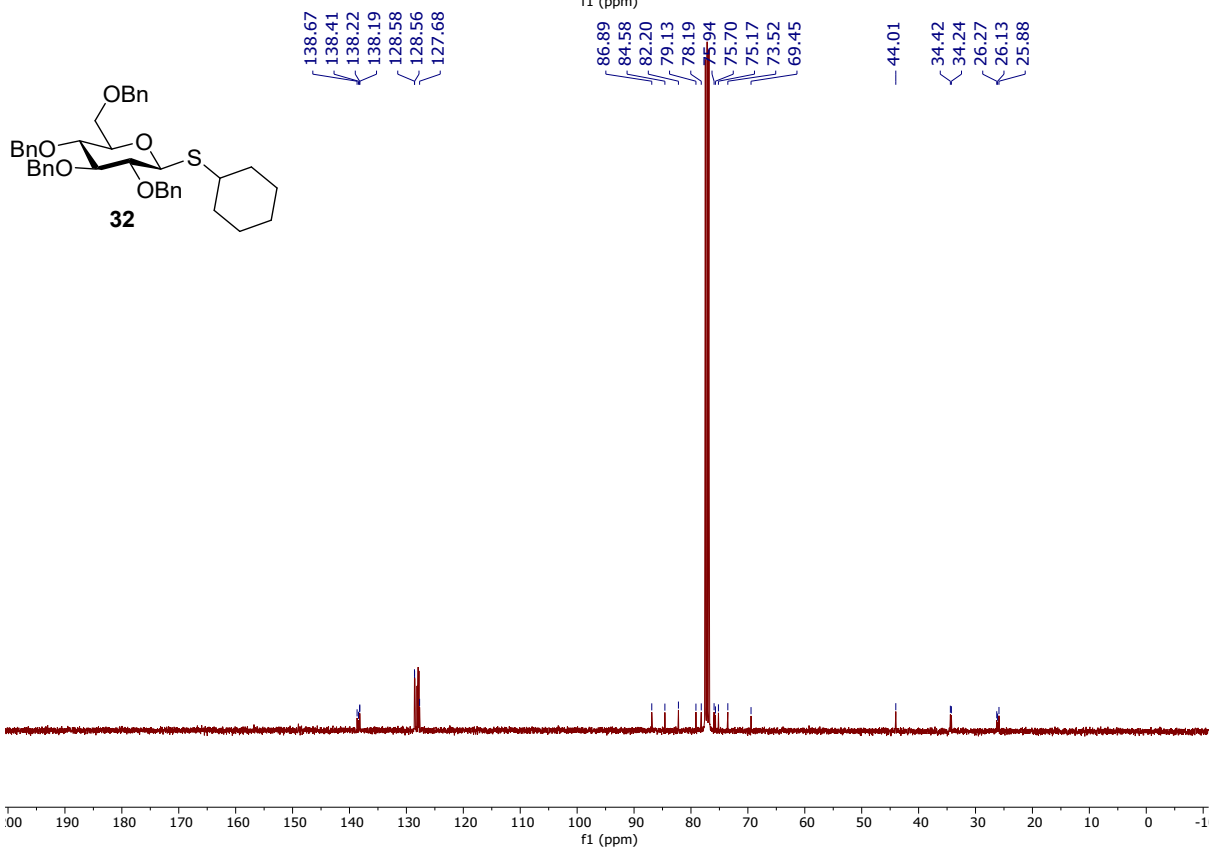

Supplement: d2ob00939k1.pdf [file d2ob00939k1.pdf]
